# Supplementary material
Source: ML conference proceedings conference paper supplement (https://openreview.net/forum?id=yPDNQvuyYM)
Supplement: supplementary_material [file PDPO_NeurIPS_paper_with_appendix.pdf › PDPO/PDPO_NeurIPS_paper_with_appendix.pdf]

---

# PDPO: Parametric Density Path Optimization

---

Anonymous Author(s)

Affiliation

Address

email

## Abstract

We introduce Parametric Density Path Optimization (PDPO), a novel method for computing action-minimizing paths between probability densities. The core idea is to represent the target probability path as the pushforward of a reference density through a parametric map, transforming the original infinite-dimensional optimization over densities to a finite-dimensional one over the parameters of the map. We derive a static formulation of the dynamic problem of action minimization and propose cubic spline interpolation of the path in parameter space to solve the static problem. Theoretically, we establish an error bound of the action under proper assumptions on the regularity of the parameter path. Empirically, we find that using 3–5 control points of the spline interpolation suffices to accurately resolve both multimodal and high-dimensional problems. We demonstrate that PDPO can flexibly accommodate a wide range of potential terms, including those modeling obstacles, mean-field interactions, stochastic control, and higher-order dynamics. Our method outperforms existing state-of-the-art approaches in benchmark tasks, demonstrating superior computational efficiency and solution quality. The source code will be publically available after the revision process.

## 1 Introduction

Optimal transport (OT) theory has become a powerful and widely used framework for quantifying discrepancies and constructing interpolations between probability distributions, with rapidly expanding applications in machine learning, statistics, and computational science [26]. It offers a principled way to compare distributions by computing the minimal cost required to transform one distribution into another. While the computation of optimal transport (OT) plans and geodesics between probability distributions is now relatively well understood [30, 21, 3, 33, 24, 12], many real-world applications require solving more complex, constrained transport problems—specifically, identifying optimal paths between distributions subject to additional requirements. For instance, one may need to guide a swarm of robots from one configuration to another while avoiding obstacles, or interpolate between data distributions in a way that preserves semantic structure [19, 28, 16].

These tasks can be formulated as action-minimizing problems governed by the “principle of least action”: Given initial and terminal densities  $\rho_0, \rho_1 \in \mathcal{P}(\mathbb{R}^d)$ , where  $\mathcal{P}(\mathbb{R}^d)$  denotes the space of probability densities over  $\mathbb{R}^d$ , the objective is to find a time-dependent density path  $\rho(t, \cdot) \in \mathcal{P}(\mathbb{R}^d)$  and a continuous velocity field  $v : [0, 1] \times \mathbb{R}^d \rightarrow \mathbb{R}^d$  that minimize the action functional:

$$\inf_{\rho(t,x), v(t,x)} \int_0^1 \int_{\mathbb{R}^d} K(v, \rho) dx - F(\rho(t)) dt \quad (1)$$

$$\text{subject to } \partial_t \rho + \nabla \cdot (\rho v) = 0, \quad \rho(0, \cdot) = \rho_0, \quad \rho(1, \cdot) = \rho_1. \quad (2)$$

Here,  $K(v, \rho)$  denotes the transportation energy, and  $F(\rho)$  represents a potential term that captures interactions among particles or with the environment. When  $K(v) = \frac{1}{2}|v|^2$  and  $F(\rho) = 0$ , this

reduces to the classical Wasserstein geodesic problem. Directly solving such action-minimizing problems poses substantial mathematical and computational challenges. In low dimensions (e.g., 2 or 3), the associated PDE system—derived from the first-order optimality conditions—can be tackled using classical numerical methods [1, 5, 6, 13]. However, these approaches do not scale well with dimension and become computationally infeasible in high-dimensional settings.

Recent advances in machine learning have greatly expanded the range of high-dimensional problems that can be tackled effectively. A leading example is the Generalized Schrödinger Bridge Method (GSBM) [19], originally developed for stochastic optimal control (SOC) problems [23]. GSBM learns forward and backward vector fields by modeling conditional densities and velocities, drawing inspiration from stochastic interpolants [2], and approximates Gaussian path statistics via spline-based optimization. In parallel, [28] introduced an algorithm for problems with linear energy potentials, leveraging Kantorovich duality and amortized inference to efficiently compute c-transforms and transportation costs. For Mean-Field Games, APAC-Net [16] casts the primal-dual formulation as a convex-concave saddle point problem, trained using a GAN-style adversarial framework.

Our method builds upon prior work on parametric probability distributions [20, 32, 14], extending these ideas to address boundary-valued action-minimizing density problems. Our formulation is an extension of the *static OT* formulation to the parameter space, whereas in [15], they extend the *dynamic formulation*. In the remainder of this section, we outline our methodology, with full technical details deferred to Section 3.

Figure 1a offers an overview of our approach: curves in parameter space  $\theta(t) \in \Theta$  (left) induce density paths  $\rho_t \in \mathcal{P}(\mathbb{R}^d)$  via pushforward maps  $\rho_t = (T_{\theta(t)})_{\#} \lambda$  from a fixed reference density  $\lambda$  (top), while samples of these densities are obtained via direct evaluation  $T_{\theta(t)}(z)$  with  $z \sim \lambda$  (right).

While spline-based methods have previously been applied to particle-level density transport [28] and Gaussian settings [19], a key innovation of our work is the use of cubic Hermite splines in the parameter space of a neural network. We fix a set of control points  $\{\theta_{t_i}\}_{i=0}^{K+1}$  with  $t_i = i/(K+1)$  and optimize over them to discover action-minimizing density paths, which presents the first spline-based parametric approach in a learned map setting. Figures 1b and 1c illustrate our method on an obstacle avoidance task, showing the pushforward of  $\lambda$  at the optimized control points and the resulting continuous path of probability densities.

The optimization of the  $K+2$  control points proceeds in the following steps: **Step 1:** Initialize a pair of boundary parameters,  $\theta_0$  and  $\theta_1$ , that accurately approximate the target boundary densities  $\rho_0$  and  $\rho_1$ . **Step 2:** With the boundary parameters  $(\theta_0, \theta_1)$  fixed, optimize the interior control points  $\{\theta_{t_i}\}_{i=1}^{K+1}$  to minimize the action associated with the coupling  $(T_{\theta_0}, T_{\theta_1})_{\#} \lambda$ . **Step 3:** Optimize

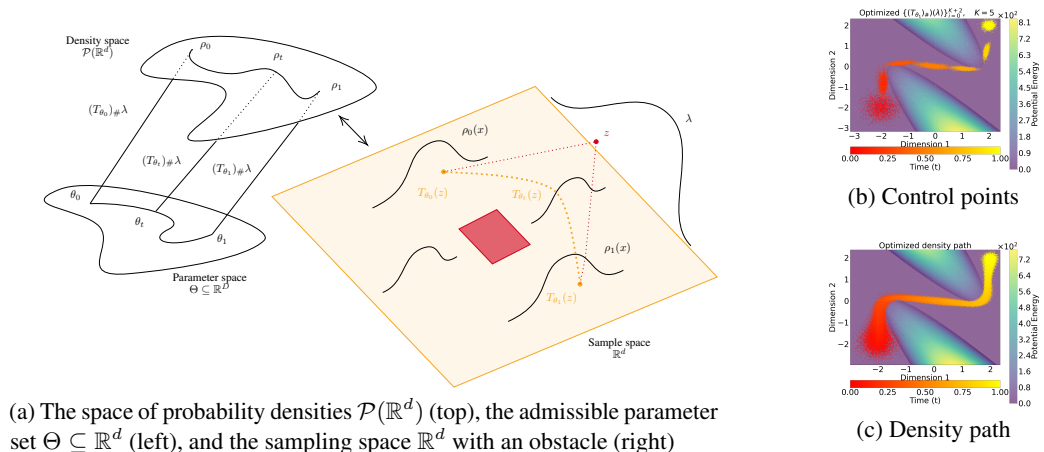

Figure 1: Visualization of our framework. (a) Illustrates the three main components: the space of probability densities  $\mathcal{P}(\mathbb{R}^d)$  (top), the admissible parameter space  $\Theta \subseteq \mathbb{R}^D$  (left), and the sampling space  $\mathbb{R}^d$  containing an obstacle (right). (b) and (c) depict the pushforwards of the optimized control points  $(T_{\theta_i})_{\#} \lambda$  for  $i = 0, \dots, K$  and the continuous spline trajectory  $(T_{\theta(t)})_{\#} \lambda$ , respectively. Time is color-coded, with red indicating  $t = 0$  and yellow indicating  $t = 1$ .

the boundary parameters  $(\theta_0, \theta_1)$  in order to improve the quality of the coupling while keeping the interior control points fixed. Repeat steps 2 and 3 iteratively until convergence.

**Contributions.** Our main contributions are: (1) We introduce Parametric Density Path Optimization (PDPO), a novel framework that transforms infinite-dimensional density path optimization into a finite-dimensional problem by parameterizing pushforward maps with cubic Hermite splines. Our approach achieves accurate density paths with as few as 3–5 control points. (2) We generalize the parametric framework to support a wide class of action-minimizing problems, including stochastic optimal control (via Fisher information), acceleration-regularized dynamics, and mean-field interactions, within a unified optimization scheme based on learned transport maps. (3) We empirically validate PDPO across several challenging benchmarks—including obstacle avoidance, entropy-constrained transport, and high-dimensional opinion dynamics—achieving up to 7% lower action, up to  $10\times$  improved boundary accuracy, and 40–80% faster runtimes compared to state-of-the-art baselines.

## 2 Background

This section presents the mathematical foundations of optimal transport, its dynamic formulation, and parametric methods that enable scalable and efficient application in machine learning contexts.

### 2.1 Optimal transport and Wasserstein distances

The Wasserstein-2 distance between two probability distributions  $\rho_0, \rho_1 \in \mathcal{P}(\mathbb{R}^d)$  is defined as:

$$W_2^2(\rho_0, \rho_1) = \inf_{\pi \in \Pi(\rho_0, \rho_1)} \int_{\mathbb{R}^d \times \mathbb{R}^d} \|x - y\|^2 d\pi(x, y), \quad (3)$$

where  $\Pi(\rho_0, \rho_1)$  denotes the set of all joint distributions with marginals  $\rho_0$  and  $\rho_1$  [31].

When  $\rho_0$  is absolutely continuous with respect to the Lebesgue measure, the Benamou–Brenier formulation [4] provides a dynamic reinterpretation of this distance:

$$W_2^2(\rho_0, \rho_1) = \inf_{\rho(t,x), v(t,x)} \int_0^1 \int_{\mathbb{R}^d} \frac{1}{2} \|v(t, x)\|^2 \rho(t, x) dx dt \quad (4)$$

$$\text{subject to } \partial_t \rho + \nabla \cdot (\rho v) = 0, \quad \rho(0, \cdot) = \rho_0, \quad \rho(1, \cdot) = \rho_1. \quad (5)$$

This dynamical formulation interprets the Wasserstein distance as the minimum kinetic energy required to continuously transport the mass of  $\rho_0$  into  $\rho_1$  over the time interval  $[0, 1]$ .

### 2.2 Generalized action-minimizing problems in Wasserstein space

We consider the following generalized action-minimizing problem:

$$\inf_{\rho(t,x), v(t,x)} \int_0^1 \int_{\mathbb{R}^d} \frac{1}{2} \|v(t, x)\|^2 \rho(t, x) dx + F(\rho(t)) dt \quad (6)$$

$$\text{subject to } \partial_t \rho + \nabla \cdot (\rho v) = 0, \quad \rho(0, \cdot) = \rho_0, \quad \rho(1, \cdot) = \rho_1,$$

where the functional  $F(\rho)$  incorporates additional constraints or potentials, defined as:

$$F(\rho) = \kappa_0 \int_{\mathbb{R}^d} V(x) \rho(x) dx + \kappa_1 \int_{\mathbb{R}^d} U(\rho(x)) dx + \kappa_2 \int_{\mathbb{R}^d \times \mathbb{R}^d} W(x - y) \rho(x) \rho(y) dx dy. \quad (7)$$

Here, the three terms correspond respectively to: external potentials (e.g., obstacles or environmental forces), internal energy (e.g., entropy or Fisher information), and interaction energy (e.g., repulsion or attraction between mass elements). The constants  $\kappa_0, \kappa_1, \kappa_2 \in \mathbb{R}_+$  model the strength of each term.

In our setup, the Fisher Information potential, given by

$$\mathcal{FI}(\rho) = \frac{\sigma^4}{8} \int \|\nabla \log \rho\|^2 \rho(x) dx, \quad (8)$$

96 plays a crucial role. As shown in prior work [10, 22] and detailed in Appendix A, it is well established  
 97 that the following deterministic control problem:

$$\begin{aligned} & \inf_{\rho(t,x), v(t,x)} \int_0^1 \int_{\mathbb{R}^d} \frac{1}{2} \|v(t,x)\|^2 \rho(t,x) dx + F(\rho(t)) + \mathcal{FI}(\rho(t)) dt \\ & \text{subject to} \quad \partial_t \rho + \nabla \cdot (\rho v) = 0, \quad \rho(0, \cdot) = \rho_0, \quad \rho(1, \cdot) = \rho_1, \end{aligned}$$

98 is equivalent to the stochastic optimal control (SOC) problem:

$$\begin{aligned} & \inf_{\rho(t,x), v(t,x)} \int_0^1 \int_{\mathbb{R}^d} \frac{1}{2} \|v(t,x)\|^2 \rho(t,x) dx + F(\rho(t)) dt \\ & \text{subject to} \quad \partial_t \rho + \nabla \cdot (\rho v) = \frac{\sigma^2}{2} \Delta \rho, \quad \rho(0, \cdot) = \rho_0, \quad \rho(1, \cdot) = \rho_1. \end{aligned}$$

99 This equivalence allows us to recast SOC problems as deterministic action-minimization tasks  
 100 augmented with a Fisher Information regularization term. While the deterministic action-minimization  
 101 formulation offers a principled framework for modeling action-minimizing dynamics, directly solving  
 102 the resulting infinite-dimensional optimization problem over probability densities is computationally  
 103 prohibitive in high dimensions. To address this, we next introduce parametric representations that  
 104 reduce the problem to a finite-dimensional setting, enabling tractable and scalable computation.

### 105 2.3 Parametric pushforward representations of probability densities

106 To render action-minimizing problems computationally tractable, we focus on parameterized families  
 107 of probability distributions, thereby reducing the original infinite-dimensional optimization problem  
 108 to a finite-dimensional one over the parameter space. This strategy builds on recent developments  
 109 in parameterized Wasserstein dynamics for solving initial-value Hamiltonian systems and gradient  
 110 flows [32, 14].

111 The work most closely related to our approach is that of [7], which formulates the Schrödinger Bridge  
 112 (SB) problem between Gaussian distributions as an action-minimization task. Leveraging the fact  
 113 that the SB solution between Gaussians remains Gaussian, they parameterize the evolving density by  
 114 its mean and covariance, and derive Euler–Lagrange equations for these parameters by projecting the  
 115 density-level optimality conditions onto the parametric space.

116 We now introduce the core elements of our parametric pushforward formulation, starting with the  
 117 definition of some key concepts. For further background, we refer the reader to [32, 15].

118 **Definition 1.** We consider a **parameter space**  $\Theta \subseteq \mathbb{R}^D$  of dimension  $D$ . We call  $T : \mathbb{R}^d \times \Theta \rightarrow \mathbb{R}^d$   
 119 a **parametric mapping**, if for every  $\theta \in \Theta$ , the function  $T(\cdot, \theta)$ , or  $T_\theta(\cdot)$  used interchangeably, is  
 120 Lebesgue measurable. The corresponding **parametric density space** is defined as

$$P_\Theta := \{\rho_\theta = (T_\theta)_\# \lambda : \theta \in \Theta\} \subseteq \mathcal{P}(\mathbb{R}^d),$$

121 where  $(T_\theta)_\# \lambda$  denotes the pushforward of a fixed reference density  $\lambda$  under the map  $T_\theta$ , see Fig-  
 122 ure 1a(top). Moreover, given a curve in the parameter space  $\theta(t) \in \Theta$  indicated by  $t \in [0, 1]$ , the  
 123 corresponding **pushforward density path** is defined as  $\rho_{\theta(t)} := (T_{\theta(t)})_\# \lambda$ , see Figure 1a(top), and  
 124 the **sample trajectories** are given by  $x_{\theta(t)}(z) = T_{\theta(t)}(z)$ ,  $z \sim \lambda$ , see Figure 1a(right).

## 125 3 Action Minimizing Problems via Parametric Pushforwards

### 126 3.1 Projection of the action-minimizing problem to the parametric setting

127 To motivate our framework, we begin by revisiting an alternative formulation of the classical  
 128 Wasserstein-2 distance defined in (3). Given  $x, y \in \mathbb{R}^d$ , define the set of admissible paths  
 129  $\Gamma(x, y) := \{\gamma(t) \in C^1([0, 1], \mathbb{R}^d) : \gamma(0) = x, \gamma(1) = y\}$ . Then the classical formula

$$\|x - y\|^2 = \inf_{\gamma(t) \in \Gamma(x, y)} \int_0^1 \|\gamma'(t)\|^2 dt$$

130 allows us to write the Wasserstein-2 distance as

$$W_2^2(\rho_0, \rho_1) = \inf_{\pi \in \Pi(\rho_0, \rho_1)} \int_{\mathbb{R}^d \times \mathbb{R}^d} \inf_{\gamma(t) \in \Gamma(x, y)} \int_0^1 \|\gamma'(t)\|^2 dt d\pi(x, y). \quad (9)$$



131 In other words, one first chooses a coupling  $\pi$  between the endpoints and then pays, for each pair  
 132  $(x, y)$ , the minimal kinetic energy needed to drive a particle from  $x$  to  $y$ . Our framework adopts  
 133 exactly this viewpoint: we cast the dynamic optimization in (6) as a static coupling problem whose  
 134 cost is still evaluated via a dynamic (least-action) criterion.

In what follows, we assume that  $\rho_0$  is absolutely continuous with respect to the Lebesgue measure, ensuring the existence of an optimal Monge map  $T^*$  [31]. We define the subset

$$\tilde{\Pi} = \{\pi \in \Pi(\rho_0, \rho_1) : \pi(x, y) = (x, T_\pi(x)) \text{ for some injective map } T_\pi : \mathbb{R}^d \rightarrow \mathbb{R}^d\}.$$

135 For each  $\pi \in \tilde{\Pi}$ , define the set  $\Gamma(\pi)$  to consist of the flow maps  $\gamma \in C^1([0, 1] \times \mathbb{R}^d, \mathbb{R}^d)$ , such that  
 136  $\gamma_t(x) := \gamma(t, x)$  describes the position at time  $t$  of a particle starting at  $x$ , i.e.,  $\gamma_0(x) = x$ ,  $\gamma_t(\cdot)$  is  
 137 diffeomorphic for each  $t \in [0, 1]$ , and  $(\gamma_0, \gamma_1)_\# \rho_0 = \pi$ . While  $\Gamma(\pi)$  may be empty for a general  
 138 coupling  $\pi \in \tilde{\Pi}$ , it is nonempty for the optimal coupling  $\pi^* := (x, T^*(x))$ : the McCann interpolation  
 139  $\gamma_t^*(x) := (1-t)x + T^*(x)$  defines a valid path in  $\Gamma(\pi^*)$ . These constructions illustrate how dynamic  
 140 least-action costs can be embedded inside a static coupling framework—the key idea underpinning  
 141 our parametric approach.

142 For any  $\pi \in \tilde{\Pi}$ , the diffeomorphism assumption ensures that the pushforward  $\rho_{\gamma_t} = (\gamma_t)_\# \rho_0$  defines  
 143 a valid probability density. Given a flow  $\gamma \in \Gamma(\pi)$ , we define its action as

$$\mathcal{A}(\gamma) = \mathbb{E}_{x \sim \rho_0} \left[ \int_0^1 \left\| \frac{d}{dt} \gamma_t(x) \right\|^2 dt \right] + \int_0^1 F(\rho_{\gamma_t}) dt, \quad (10)$$

144 where the first term measures the expected kinetic energy of the particle trajectories, and the second  
 145 term captures the accumulated potential over the evolving density path. The cost associated with the  
 146 coupling  $\pi \in \tilde{\Pi}$  is then defined as

$$c(\pi) = \inf_{\gamma \in \Gamma(\pi)} \mathcal{A}(\gamma).$$

147 If  $\pi$  is such that  $\Gamma(\pi) = \emptyset$ , we define  $c(\pi) = +\infty$ . Thus, without loss of generality, we consider  
 148  $\tilde{\Pi}$  to be the set of couplings for which  $\Gamma(\pi)$  is non-empty. Our primary objective is the following  
 149 action-minimizing problem:

$$\inf_{\pi \in \tilde{\Pi}(\rho_0, \rho_1)} c(\pi) = \inf_{\pi \in \tilde{\Pi}(\rho_0, \rho_1)} \inf_{\gamma \in \Gamma(\pi)} \mathcal{A}(\gamma). \quad (11)$$

150 To the best of our knowledge, this formulation is novel. While related ideas appear in [28] and [31],  
 151 those works are limited to linear potentials or “lifted” Lagrangians. In contrast, our formulation  
 152 includes internal and interaction energy terms, which significantly alter the structure of the problem.  
 153 In particular, the cost of each particle trajectory depends not only on its velocity and position, but  
 154 also on the global density path  $\rho_t$ .

155 The following theorem, whose proof can be found in Appendix B, establishes the equivalence between  
 156 the dynamic and static formulations given in Equations (6) and (11), respectively.

157 **Theorem 1.** *The dynamic formulation in Equation (6) is equivalent to the static formulation in*  
 158 *Equation (11).*

With these definitions in place, we now formulate the action-minimizing problem from a parametric perspective. Let the parameter space  $\Theta$ , the parametric map  $T$ , and the reference density  $\lambda$  be fixed. Define the set of admissible boundary parameters as

$$\Theta_0^1 = \{(\theta_0, \theta_1) \in \mathbb{R}^D \times \mathbb{R}^D : (T_{\theta_i})_\# \lambda = \rho_i, i = 0, 1\}.$$

159 Given a parameter curve with boundary condition  $\theta_{0 \rightarrow 1} \in \Theta_{0 \rightarrow 1} := \{\theta_{0 \rightarrow 1} \in C^1([0, 1], \Theta) : \theta(0) =$   
 160  $\theta_0, \theta(1) = \theta_1\}$ , we define its action (by slight abuse of notation) as

$$\mathcal{A}(\theta_{0 \rightarrow 1}) := \mathbb{E}_{z \sim \lambda} \left[ \int_0^1 \left\| \frac{d}{dt} T_{\theta(t)}(z) \right\|^2 dt \right] + \int_0^1 F((T_{\theta(t)})_\# \lambda) dt, \quad (12)$$

161 where  $T_{\theta(t)}(z)$  denotes the transported trajectory at  $t$  of a particle  $z$  drawn from the reference  
 162 distribution with density  $\lambda$ . The corresponding parametric action-minimization problem is given by:

$$\inf_{(\theta_0, \theta_1) \in \Theta_0^1} \inf_{\theta_{0 \rightarrow 1} \in \Theta_{0 \rightarrow 1}} \mathcal{A}(\theta_{0 \rightarrow 1}). \quad (13)$$

163 This formulation parallels the coupling-based problem in Equation (11) but operates directly in the  
 164 parameter space of the transport maps.

165 While [15] explored the Lagrangian formulation of Equation (6) in parameter space from a theoretical  
 166 perspective, our approach in Equation (13) introduces an alternative formulation based on coupling  
 167 costs. This perspective not only offers conceptual clarity but also lends itself naturally to numerical  
 168 implementation.

169 Motivated by [19], we employ cubic Hermite spline approximation of the parameter curve  $\theta_{0 \rightarrow 1}$  in  
 170 solving the optimization problem (13). The following theorem provides an estimate for the error  
 171 introduced in the objective action. The full set of assumptions and proof are provided in Appendix C.

172 **Theorem 2.** *Let  $\theta_{0 \rightarrow 1}$  be a parameter curve with  $l \geq 1$  continuous derivatives, and let  $\tilde{\theta}_{0 \rightarrow 1}$  be its*  
 173 *cubic Hermite spline approximation using  $K$  uniformly spaced control (collocation) points. Then the*  
 174 *error in the action satisfies  $|\mathcal{A}[\theta_{0 \rightarrow 1}] - \mathcal{A}[\tilde{\theta}_{0 \rightarrow 1}]| = O(h^{\kappa-1})$ , where  $\kappa := \min(l, 4)$ .*

175 While action-minimizing curves can be computed analytically or via numerical integration for simple  
 176 parametric families (e.g., affine maps) and linear potentials (see [32]), such formulations are inherently  
 177 limited in expressivity. To overcome this, we adopt Neural ODEs [8] as flexible and expressive  
 178 parametric maps for modeling complex density dynamics.

### 179 3.2 Pushforward map via Neural ODE

180 Neural Ordinary Differential Equations (Neural ODEs) [8] define continuous-time transformations  
 181 via parameterized differential equations:

$$\frac{d\psi(\tau, z)}{d\tau} = v_{\theta}(\tau, \psi(\tau, z)), \quad \psi(0, z) = z \sim \lambda, \quad (14)$$

182 where  $v_{\theta} : [0, 1] \times \mathbb{R}^d \rightarrow \mathbb{R}^d$  is a neural network parameterized by  $\theta$ ,  $\lambda$  is typically a standard normal  
 183 distribution, and  $\tau$  denotes the ODE time variable. The resulting transport map is defined as:

$$T_{\theta}(z) = z + \int_0^1 v_{\theta}(\tau, \psi(\tau, z)) d\tau. \quad (15)$$

184 We adopt Neural ODEs as parametric maps due to their ability to support efficient computation of  
 185 both the entropy  $\log(\rho)$  and the score  $\nabla_x \log(\rho)$  through auxiliary ODE systems [34]. Details of  
 186 these complementary entropy and score equations are provided in Appendix D.

### 187 3.3 Optimization framework

188 The static formulation (13) defines a bilevel optimization problem: the boundary conditions ensure  
 189 feasibility by satisfying  $(T_{\theta_i})_{\#} \lambda = \rho_i, i = 0, 1$ . The curve  $\theta_{0 \rightarrow 1}$  minimizes the action and deter-  
 190 mines the coupling cost. From the perspective of the spline control points  $\{\theta_{t_i}\}_{i=0}^{K+1}$ , the boundary  
 191 parameters are  $\theta_0, \theta_1$ , while the interior path is defined by  $\{\theta_{t_i}\}_{i=1}^K$ . This motivates our optimization  
 192 strategy:

193 **Step 1: Initialization.** First, initialize the boundary parameters  $\theta_0$  and  $\theta_1$  such that  $(T_{\theta_i})_{\#} \lambda$  are  
 194 good approximations of  $\rho_i$  for  $i = 0, 1$ . We employ Flow Matching (FM) for its efficiency. We in  
 195 general consider this step outside of the main algorithm. A parameter can be used for any functional,  
 196 so once a boundary parameter has been obtained, it can be reused across multiple problems. Second,  
 197 initialize the control points  $\{\theta_{t_i}\}_{i=1}^K$  as the linear interpolation of  $\theta_0$  and  $\theta_1$ . Then run a few iterations  
 198 of path optimization with  $F(\rho) = 0$ . In Appendix F.1 and Appendix F.2, we show the computational  
 199 advantages of each part of the initialization step.

200 **Step 2: Path optimization.** Perform a gradient-based path optimization to update the interior control  
 201 points  $\{\theta_{t_i}\}_{i=1}^K$  to minimize the action (12), while keeping the boundary parameters fixed, see details  
 202 in Algorithm 1. The action functional (12) is evaluated using the trapezoidal rule with  $N$  time  
 203 steps and  $M$  Monte Carlo samples. The gradient is computed using automatic differentiation. See  
 204 Algorithm 1

205 **Step 3: Boundary/coupling optimization.** Optimize the boundary parameters  $(\theta_0, \theta_1)$  while keeping  
 206 the interior spline control points  $\{\theta_{t_i}\}_{i=1}^K$  fixed, see details in Algorithm 2. Specifically, we formulate

207 this as a penalized optimization problem:

$$\min_{\theta_0, \theta_1 \in \Theta} \mathbb{E}_{z \sim \lambda} \left[ \sum_{i=0}^1 \alpha_i L((T_{\theta_i})_{\#} \lambda, \rho_i) \right] + \mathcal{A}[\theta_{0 \rightarrow 1}]. \quad (16)$$

208 Here  $L$  is a dissimilarity metric between distributions, for which we use the FM loss function. The  
 209 weights  $\alpha_i$ ,  $i = 0, 1$ , balance boundary accuracy and coupling optimality. The action  $\mathcal{A}[\theta_{0 \rightarrow 1}]$  (12) is  
 210 added as a penalty term, which is estimated at the current control points, see Algorithm 2

211 We repeat the optimizations of step 2 and step 3 alternatively until convergence, producing both an  
 212 optimal coupling and a minimal-action path between  $\rho_0$  and  $\rho_1$ , see Algorithm 3. Observe as long as  
 213 the action is lower bounded, step 2 will converge to a local minimum. The dissimilarity is assumed to  
 214 be nonnegative, thus step 3 also converges to a local minimum.

## 215 4 Experiments

216 We conduct a comprehensive evaluation of our method across a variety of benchmark scenarios to  
 217 demonstrate its accuracy, efficiency, flexibility, and scalability. In all experiments, we compare against  
 218 GSBM [19], the current state-of-the-art, which has been shown to outperform earlier approaches.  
 219 Where appropriate, we also include comparisons with Neural Lagrangian Optimal Transport (NLOT)  
 220 [28] and APAC-Net [16]. It is important to note that NLOT is limited to linear potentials, while  
 221 APAC-Net is specifically designed for mean-field games (MFG) and employs soft terminal costs  
 222 instead of enforcing hard distributional constraints.

223 In F.3 we include an ablation study on the number of control points.

### 224 4.1 Implementation details

225 We implement our method in PyTorch [27], and run all experiments on an AMD 7543 CPU + NVIDIA  
 226 RTX A6000 GPU. The Wasserstein-2 distance is approximated using the POT library [11] with 3,000  
 227 samples. For estimating the action, we use Monte Carlo integration with 3,000 samples and compute  
 228 the time integral using the trapezoidal rule with a step size of  $\Delta t = 1/50$ . Each experiment is  
 229 repeated across three random trials with different seeds. Additional implementation and experimental  
 230 details are provided in Appendix F. In Table 2 see the boundary conditions  $\rho_0$  and  $\rho_1$ , and Table 2 the  
 231 hyper-parameters for the PDPO algorithm.

### 232 4.2 Obstacle avoidance with mean-field interactions

233 We demonstrate the effectiveness of our method through three challenging obstacle avoidance  
 234 scenarios involving mean-field interactions. See Appendix F.4 for their mathematical definitions.

Table 1: Comparison for obstacle avoidance with mean-field interactions. The densities  $\tilde{\rho}_0$  and  $\tilde{\rho}_1$  are the densities obtained by each one of the numerical schemes.

| Potential            | $\mathcal{A}[\theta]$                | $W_2^2(\tilde{\rho}_0, \rho_0)$     | $W_2^2(\tilde{\rho}_1, \rho_1)$       | T(m)              |
|----------------------|--------------------------------------|-------------------------------------|---------------------------------------|-------------------|
| S-Curve-C (PDPO)     | <b>39.90 <math>\pm</math> 0.16</b>   | <b>0.028 <math>\pm</math> 0.001</b> | <b>0.0135 <math>\pm</math> 0.0014</b> | <b>10m 56s</b>    |
| S-Curve-C (GSBM)     | 40.02 $\pm$ .75                      | 0.21 $\pm$ 0.01                     | 0.25 $\pm$ 0.045                      | 20m 30s           |
| S-Curve-C (Apac-net) | 39.95 $\pm$ 0.2515                   | 0                                   | 0.093 $\pm$ 0.0015                    | 12m 10s           |
| V-Neck-E-FI (PDPO)   | <b>148.91 <math>\pm</math> 0.72</b>  | <b>0.082 <math>\pm</math> 0.004</b> | 0.078 $\pm$ 0.003                     | <b>1h 10m 16s</b> |
| V-Neck-E-FI (GSBM)   | 156.80 $\pm$ 4.31                    | 0.086 $\pm$ 0.004                   | <b>0.062 <math>\pm</math> 0.008</b>   | 1h 55m 24s        |
| GMM (PDPO)           | <b>79.456 <math>\pm</math> 0.617</b> | 0                                   | 0.3586 $\pm$ 0.0180                   | <b>8m28s</b>      |
| GMM (GSBM)           | 88.773 $\pm$ 3.309                   | 0.8059 $\pm$ 0.2377                 | <b>0.2575 <math>\pm</math> 0.0185</b> | 2hr 3m            |
| GMM (NLOT)           | 82.059 $\pm$ 2.795                   | 0                                   | 0.6285 $\pm$ 0.2945                   | 1hr 57m           |

235 **S-curve with congestion (S-curve-C)** from [16]: Particles navigate around two obstacles arranged in  
 236 an "S"-shaped configuration while interacting with one another. PDPO achieves superior performance  
 237 compared to existing methods (GSBM and APAC-Net), yielding lower action values, more accurate  
 238 boundary approximation, and faster runtimes (see Table 1).

239 Notably, the interpolated density path generated by PDPO (Figure 2b) exhibits clear nonlinearity  
 240 between control points. As shown in Figure 2a, a linear interpolation of the density between control

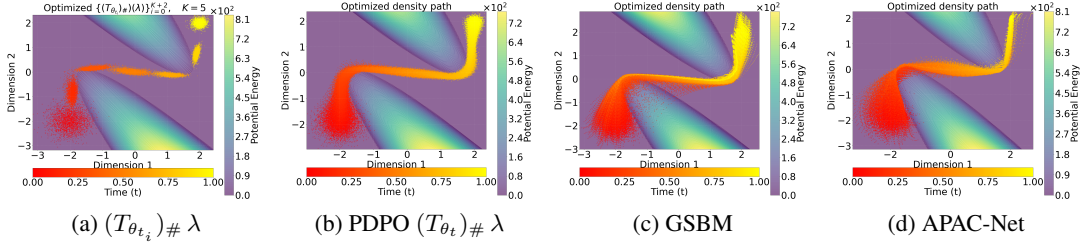

Figure 2: S-curve-C: (a) Pushforward densities at control points, (b) Pushforward densities along the interpolated trajectory, (c) Density path produced by GSBM, (d) Density path produced by APAC-Net

points  $\theta_{t_1}$  (red) and  $\theta_{t_2}$  (orange) would intersect the obstacles. This highlights how PDPO’s spline-based parameterization effectively exploits the geometry of the parameter space to avoid infeasible paths. Note that both GSBM and APAC-Net violate the obstacle avoidance constraint in this scenario.

**V-neck with entropy and Fisher information (V-Neck-E-FI)** from [19]: This stochastic optimal control (SOC) problem involves particles navigating a narrow channel while minimizing entropy, see Figure 10b. PDPO outperforms GSBM by achieving lower action values, comparable boundary accuracy, and significantly faster runtime (see Table 1). When GSBM is restricted to the same runtime as PDPO (details in Appendix F.4), its action value remains similar, but its boundary approximation deteriorates by an order of magnitude.

**Gaussian mixture obstacle (GMM)** from [19]: In this benchmark, particles must move between multimodal source and target distributions while avoiding a Gaussian mixture-shaped obstacle, see Figure 12 for the density path in the appendix. This example demonstrates PDPO’s flexibility in selecting different reference distributions. By setting the reference distribution  $\lambda = \rho_0$ , there is no approximation error at time  $t = 0$ . In Table 1 we compare against GSBM and NLOT. Our approach achieves a slight improvement of 0.04% in the action, but the computational time was reduced by approximately 85% from nearly 2 hours to less than 10 minutes. While GSBM achieves a marginally better boundary representation for  $\rho_1$ , our method offers comparable optimization quality with substantially faster computation.

### 4.3 Generalized momentum minimization

Building on the momentum Schrödinger Bridge (SB) framework by [9], we extend action-minimizing problems to incorporate acceleration alongside additional potential terms. This leads to a novel formulation that minimizes the following objective:

$$\mathcal{A}(\gamma) = \mathbb{E}_{x \sim \rho_0} \left[ \int_0^1 \left\| \frac{d^2}{dt^2} \gamma_t(x) \right\|^2 dt \right] + \int_0^1 F(\rho_{\gamma_t}) dt.$$

Figure 3 illustrates PDPO solutions for the obstacle avoidance with mean-field interaction class of problems. The resulting paths are noticeably smoother, compare the first and second columns of Figure 3

To the best of our knowledge, PDPO is the first method capable of solving such generalized momentum-based optimization problems with potential terms. This highlights the flexibility and extensibility of our framework beyond classical Wasserstein geodesics.

### 4.4 High-dimensional opinion depolarization

We now examine the opinion depolarization problem in a 1,000-dimensional space, following [29] and [18]. For full mathematical details, see Appendix F.5. As shown in Figure 4, PDPO achieves

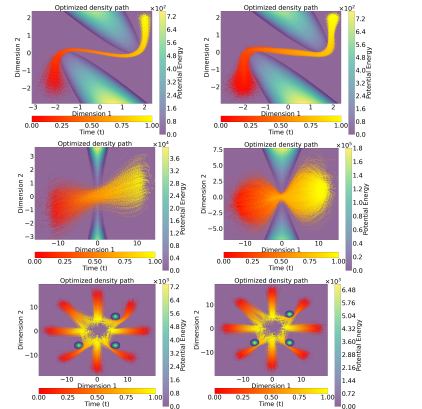

Figure 3: Comparison of solutions for generalized momentum-minimizing problems (left) and kinetic energy minimizing problems (right).

277 results comparable in quality to those reported in [19], as evidenced by the 2D PCA projections of the  
 278 distribution’s terminal time and its directional similarity histograms. The histograms reflect the distri-  
 279 bution of cosine similarity values between all pairs of opinion vectors in the population—measuring  
 280 the degree of alignment between opinions, regardless of magnitude.

281 A key advantage of our approach is its computational efficiency: while GSBM took over 5 hours  
 282 to complete the run, PDPO finished in just 23 minutes. We attribute the success of PDPO in this  
 283 high-dimensional setting to the following facts. First, from its initialization, the spline path  $\theta_{0 \rightarrow 1}$   
 284 readily reaches the non-polarized target boundary at time  $t = 1$ , second the spline path connects the  
 285 boundary conditions independently of the polarization term  $f_{\text{polarize}}$ .

## 286 5 Computational complexity

287 The primary computational cost in our algorithm  
 288 arises from pushforward evaluations. When the  
 289 action integral is approximated using  $N$  time  
 290 points, our method requires evaluating  $N$  Neu-  
 291 ral ODEs (NODEs). Each NODE involves inte-  
 292 grating a velocity field using 10 time steps. For  
 293 expectation estimates, we use  $M$  Monte Carlo  
 294 samples per NODE.

295 When the functional  $F$  includes entropy and  
 296 Fisher Information terms, the cost increases sub-  
 297 stantially. Computing the entropy requires solv-  
 298 ing an additional 1D ODE, while the Fisher  
 299 Information involves a separate  $d$ -dimensional  
 300 ODE, where  $d$  is the problem dimension. In to-  
 301 tal, this results in  $O(N \times M \times (1 + d))$  ODE  
 302 evaluations for problems involving both terms.

303 In Appendix F.6, we showcase the scalability of  
 304 our method with a 50-dimensional Schrödinger  
 305 Bridge example, representing the highest-dimensional case with Fisher Information we have success-  
 306 fully computed.

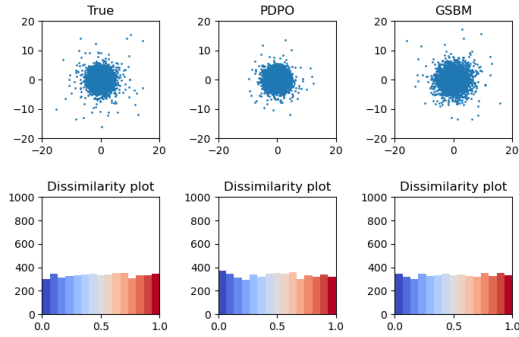

Figure 4: Opinion depolarization in 1000 dimen-  
 sions. Top: 2D PCA projections of the distribu-  
 tions. Bottom: directional similarity histograms.  
 Left: target unimodal distribution. Middle: PDPO  
 solution. Right: DeepGSB solution.

## 307 6 Conclusions

308 We introduced Parametric Density Path Optimization (PDPO), a general framework for solving action-  
 309 minimizing problems over probability densities by leveraging parameterized pushforward maps. This  
 310 approach transforms the original infinite-dimensional optimization over density paths into a tractable,  
 311 finite-dimensional problem in parameter space, using cubic splines with a small number of control  
 312 points. The key strengths of PDPO lie in its flexibility and computational efficiency. By operating  
 313 in parameter space, our method effectively handles complex problem settings—including nonlinear  
 314 potentials, mean-field interactions, and higher-order dynamics—where traditional approaches often  
 315 struggle. Experimental results show that PDPO matches or surpasses state-of-the-art methods in  
 316 accuracy, while requiring substantially less computation time.

317 Currently, our implementation is limited to NODEs with MLP architectures, see Appendix F, which  
 318 limits applications to image-based transport problems, unlike GSBM [19].

## 319 7 Broader Impact

320 The study of action-minimizing problems in density space might have applications in the study of  
 321 population dynamics.

## References

- [1] Yves Achdou and Italo Capuzzo-Dolcetta. Mean Field Games: Numerical Methods. *SIAM Journal on Numerical Analysis*, 48(3):1136–1162, January 2010. ISSN 0036-1429, 1095-7170. doi: 10.1137/090758477. URL <http://epubs.siam.org/doi/10.1137/090758477>.
- [2] Michael S. Albergo, Nicholas M. Boffi, and Eric Vanden-Eijnden. Stochastic Interpolants: A Unifying Framework for Flows and Diffusions, March 2023. URL <http://arxiv.org/abs/2303.08797>. arXiv:2303.08797 [cond-mat].
- [3] Brandon Amos, Lei Xu, and J. Zico Kolter. Input Convex Neural Networks. In *Proceedings of the 34th International Conference on Machine Learning*, pages 146–155. PMLR, July 2017. URL <https://proceedings.mlr.press/v70/amos17b.html>. ISSN: 2640-3498.
- [4] Jean-David Benamou and Yann Brenier. A computational fluid mechanics solution to the Monge-Kantorovich mass transfer problem. *Numerische Mathematik*, 84(3):375–393, January 2000. ISSN 0945-3245. doi: 10.1007/s002110050002. URL <https://doi.org/10.1007/s002110050002>.
- [5] Jean-David Benamou and Guillaume Carlier. Augmented Lagrangian Methods for Transport Optimization, Mean Field Games and Degenerate Elliptic Equations. *Journal of Optimization Theory and Applications*, 167(1):1–26, October 2015. ISSN 0022-3239, 1573-2878. doi: 10.1007/s10957-015-0725-9. URL <http://link.springer.com/10.1007/s10957-015-0725-9>.
- [6] Joe Benton, George Deligiannidis, and Arnaud Doucet. Error bounds for flow matching methods. *Transactions on Machine Learning Research*, 2024. ISSN 2835-8856. URL <https://openreview.net/forum?id=uqQPyWFDhY>.
- [7] Charlotte Bunne, Ya-Ping Hsieh, Marco Cuturi, and Andreas Krause. The Schrödinger Bridge between Gaussian Measures has a Closed Form. In *Proceedings of The 26th International Conference on Artificial Intelligence and Statistics*, pages 5802–5833. PMLR, April 2023. URL <https://proceedings.mlr.press/v206/bunne23a.html>. ISSN: 2640-3498.
- [8] Tian Qi Chen, Yulia Rubanova, Jesse Bettencourt, and David K Duvenaud. Neural Ordinary Differential Equations.
- [9] Tianrong Chen, Guan-Horng Liu, Molei Tao, and Evangelos Theodorou. Deep Momentum Multi-Marginal Schrödinger Bridge. November 2023. URL <https://openreview.net/forum?id=ykvvv0gc4R>.
- [10] Yongxin Chen, Tryphon T. Georgiou, and Michele Pavon. On the Relation Between Optimal Transport and Schrödinger Bridges: A Stochastic Control Viewpoint. *Journal of Optimization Theory and Applications*, 169(2):671–691, May 2016. ISSN 1573-2878. doi: 10.1007/s10957-015-0803-z. URL <https://doi.org/10.1007/s10957-015-0803-z>.
- [11] Rémi Flamary, Nicolas Courty, Alexandre Gramfort, Mokhtar Z. Alaya, Aurélie Boissunon, Stanislas Chambon, Laetitia Chapel, Adrien Corenflos, Kilian Fatras, Nemo Fournier, Léo Gautheron, Nathalie T. H. Gayraud, Hicham Janati, Alain Rakotomamonjy, Ievgen Redko, Antoine Rolet, Antony Schutz, Vivien Seguy, Danica J. Sutherland, Romain Tavenard, Alexander Tong, and Titouan Vayer. POT: Python Optimal Transport. *Journal of Machine Learning Research*, 22(78):1–8, 2021. ISSN 1533-7928. URL <http://jmlr.org/papers/v22/20-451.html>.
- [12] Han Huang, Jiajia Yu, Jie Chen, and Rongjie Lai. Bridging mean-field games and normalizing flows with trajectory regularization. *Journal of Computational Physics*, 487:112155, August 2023. ISSN 0021-9991. doi: 10.1016/j.jcp.2023.112155. URL <https://www.sciencedirect.com/science/article/pii/S0021999123002504>.
- [13] Matt Jacobs, Flavien Léger, Wuchen Li, and Stanley Osher. Solving Large-Scale Optimization Problems with a Convergence Rate Independent of Grid Size. *SIAM Journal on Numerical Analysis*, 57(3):1100–1123, January 2019. ISSN 0036-1429, 1095-7170. doi: 10.1137/18M118640X. URL <https://epubs.siam.org/doi/10.1137/18M118640X>.

- [14] Yijie Jin, Shu Liu, Hao Wu, Xiaojing Ye, and Haomin Zhou. Parameterized Wasserstein gradient flow. *Journal of Computational Physics*, 524:113660, March 2025. ISSN 0021-9991. doi: 10.1016/j.jcp.2024.113660. URL <https://www.sciencedirect.com/science/article/pii/S0021999124009082>.
- [15] Wuchen Li and Stanley Osher. Constrained dynamical optimal transport and its Lagrangian formulation, September 2018. URL <http://arxiv.org/abs/1807.00937>. arXiv:1807.00937 [math].
- [16] Alex Tong Lin, Samy Wu Fung, Wuchen Li, Levon Nurbekyan, and Stanley J. Osher. Alternating the population and control neural networks to solve high-dimensional stochastic mean-field games. *Proceedings of the National Academy of Sciences*, 118(31):e2024713118, August 2021. doi: 10.1073/pnas.2024713118. URL <https://www.pnas.org/doi/10.1073/pnas.2024713118>. Publisher: Proceedings of the National Academy of Sciences.
- [17] Yaron Lipman, Ricky T. Q. Chen, Heli Ben-Hamu, Maximilian Nickel, and Matthew Le. Flow Matching for Generative Modeling. September 2022. URL <https://openreview.net/forum?id=PqvMRDCJT9t>.
- [18] Guan-Hong Liu, Tianrong Chen, Oswin So, and Evangelos Theodorou. Deep Generalized Schrödinger Bridge. October 2022. URL <https://openreview.net/forum?id=fp33Nsh005>.
- [19] Guan-Hong Liu, Yaron Lipman, Maximilian Nickel, Brian Karrer, Evangelos A. Theodorou, and Ricky T. Q. Chen. Generalized Schrödinger Bridge Matching. arXiv, April 2024. URL <http://arxiv.org/abs/2310.02233>. arXiv:2310.02233.
- [20] Shu Liu, Wuchen Li, Hongyuan Zha, and Haomin Zhou. Neural Parametric Fokker–Planck Equation. *SIAM Journal on Numerical Analysis*, 60(3):1385–1449, June 2022. ISSN 0036-1429. doi: 10.1137/20M1344986. URL <https://epubs.siam.org/doi/10.1137/20M1344986>. Publisher: Society for Industrial and Applied Mathematics.
- [21] Shu Liu, Stanley Osher, and Wuchen Li. A Natural Primal-Dual Hybrid Gradient Method for Adversarial Neural Network Training on Solving Partial Differential Equations, December 2024. URL <http://arxiv.org/abs/2411.06278>. arXiv:2411.06278 [math].
- [22] Flavien Léger and Wuchen Li. Hopf-Cole transformation via generalized Schrödinger bridge problem, January 2019. URL <http://arxiv.org/abs/1901.09051>. arXiv:1901.09051 [math].
- [23] Toshio Mikami. Stochastic optimal transport revisited. *SN Partial Differential Equations and Applications*, 2(1):5, February 2021. ISSN 2662-2963, 2662-2971. doi: 10.1007/s42985-020-00059-3. URL <http://arxiv.org/abs/2003.11811>. arXiv:2003.11811 [math].
- [24] Derek Onken, Samy Wu Fung, Xingjian Li, and Lars Ruthotto. OT-Flow: Fast and Accurate Continuous Normalizing Flows via Optimal Transport. *Proceedings of the AAAI Conference on Artificial Intelligence*, 35(10):9223–9232, May 2021. ISSN 2374-3468. doi: 10.1609/aaai.v35i10.17113. URL <https://ojs.aaai.org/index.php/AAAI/article/view/17113>. Number: 10.
- [25] Adam Paszke, Sam Gross, Francisco Massa, Adam Lerer, James Bradbury, Gregory Chanan, Trevor Killeen, Zeming Lin, Natalia Gimelshein, Luca Antiga, Alban Desmaison, Andreas Köpf, Edward Yang, Zach DeVito, Martin Raison, Alykhan Tejani, Sasank Chilamkurthy, Benoit Steiner, Lu Fang, Junjie Bai, and Soumith Chintala. PyTorch: An Imperative Style, High-Performance Deep Learning Library, December 2019. URL <http://arxiv.org/abs/1912.01703>. arXiv:1912.01703 [cs].
- [26] Gabriel Peyré and Marco Cuturi. Computational optimal transport: With applications to data science. *Foundations and Trends® in Machine Learning*, 11(5-6):355–607, 2019. ISSN 1935-8237. doi: 10.1561/22000000073. URL <http://dx.doi.org/10.1561/22000000073>.

- 419 [27] Michael Poli, Stefano Massaroli, Atsushi Yamashita, Hajime Asama, Jinkyoo Park, and Stefano  
420 Ermon. Torchdyn: Implicit models and neural numerical methods in pytorch.
- 421 [28] Aram-Alexandre Pooladian, Carles Domingo-Enrich, Ricky T. Q. Chen, and Brandon Amos.  
422 Neural Optimal Transport with Lagrangian Costs. June 2024. URL [https://openreview.  
423 net/forum?id=x4paJ2sJyZ](https://openreview.net/forum?id=x4paJ2sJyZ).
- 424 [29] Simon Schweighofer, David Garcia, and Frank Schweitzer. An agent-based model of multi-  
425 dimensional opinion dynamics and opinion alignment. *Chaos: An Interdisciplinary Journal of  
426 Nonlinear Science*, 30(9):093139, September 2020. ISSN 1054-1500. doi: 10.1063/5.0007523.  
427 URL <https://doi.org/10.1063/5.0007523>.
- 428 [30] Alexander Tong, Nikolay Malkin, Guillaume Huguet, Yanlei Zhang, Jarrid Rector-Brooks,  
429 Kilian Fatras, Guy Wolf, and Yoshua Bengio. Improving and generalizing flow-based generative  
430 models with minibatch optimal transport, October 2023. URL [http://arxiv.org/abs/2302.  
431 00482](http://arxiv.org/abs/2302.00482). arXiv:2302.00482 [cs].
- 432 [31] Cédric Villani. *Optimal Transport*, volume 338 of *Grundlehren der mathematischen Wis-  
433 senschaften*. Springer, Berlin, Heidelberg, 2009. ISBN 978-3-540-71049-3 978-3-540-  
434 71050-9. doi: 10.1007/978-3-540-71050-9. URL [http://link.springer.com/10.1007/  
435 978-3-540-71050-9](http://link.springer.com/10.1007/978-3-540-71050-9).
- 436 [32] Hao Wu, Shu Liu, Xiaojing Ye, and Haomin Zhou. Parameterized Wasserstein Hamiltonian  
437 Flow. *SIAM Journal on Numerical Analysis*, 63(1):360–395, February 2025. ISSN 0036-1429,  
438 1095-7170. doi: 10.1137/23M159281X. URL [https://epubs.siam.org/doi/10.1137/  
439 23M159281X](https://epubs.siam.org/doi/10.1137/23M159281X).
- 440 [33] Yujia Xie, Minshuo Chen, Haoming Jiang, Tuo Zhao, and Hongyuan Zha. On Scalable  
441 and Efficient Computation of Large Scale Optimal Transport. April 2019. URL [https:  
442 //openreview.net/forum?id=S1xA7ILF0V](https://openreview.net/forum?id=S1xA7ILF0V).
- 443 [34] Mo Zhou, Stanley Osher, and Wuchen Li. Score-based Neural Ordinary Differential Equations  
444 for Computing Mean Field Control Problems, January 2025. URL [http://arxiv.org/abs/  
445 2409.16471](http://arxiv.org/abs/2409.16471). arXiv:2409.16471 [math].



## NeurIPS Paper Checklist

### 1. Claims

Question: Do the main claims made in the abstract and introduction accurately reflect the paper's contributions and scope?

Answer: [\[Yes\]](#)

Justification: We provide the proof of the consistency of our static formulation of the dynamic problem. We show that in all the examples of the paper 3-5 control points are enough to obtain state-of-the-art results. We further provide an ablation study on the influence of the number of control points.

Guidelines:

- The answer NA means that the abstract and introduction do not include the claims made in the paper.
- The abstract and/or introduction should clearly state the claims made, including the contributions made in the paper and important assumptions and limitations. A No or NA answer to this question will not be perceived well by the reviewers.
- The claims made should match theoretical and experimental results, and reflect how much the results can be expected to generalize to other settings.
- It is fine to include aspirational goals as motivation as long as it is clear that these goals are not attained by the paper.

### 2. Limitations

Question: Does the paper discuss the limitations of the work performed by the authors?

Answer: [\[Yes\]](#)

Justification: In Sections section 5 we discuss the algorithm's computational complexity and its limitation for high-dimensional SOC problems. We further discuss, see Section 6, the algorithm's current limitation on using MLPs for the NODE architecture.

Guidelines:

- The answer NA means that the paper has no limitation while the answer No means that the paper has limitations, but those are not discussed in the paper.
- The authors are encouraged to create a separate "Limitations" section in their paper.
- The paper should point out any strong assumptions and how robust the results are to violations of these assumptions (e.g., independence assumptions, noiseless settings, model well-specification, asymptotic approximations only holding locally). The authors should reflect on how these assumptions might be violated in practice and what the implications would be.
- The authors should reflect on the scope of the claims made, e.g., if the approach was only tested on a few datasets or with a few runs. In general, empirical results often depend on implicit assumptions, which should be articulated.
- The authors should reflect on the factors that influence the performance of the approach. For example, a facial recognition algorithm may perform poorly when image resolution is low or images are taken in low lighting. Or a speech-to-text system might not be used reliably to provide closed captions for online lectures because it fails to handle technical jargon.
- The authors should discuss the computational efficiency of the proposed algorithms and how they scale with dataset size.
- If applicable, the authors should discuss possible limitations of their approach to address problems of privacy and fairness.
- While the authors might fear that complete honesty about limitations might be used by reviewers as grounds for rejection, a worse outcome might be that reviewers discover limitations that aren't acknowledged in the paper. The authors should use their best judgment and recognize that individual actions in favor of transparency play an important role in developing norms that preserve the integrity of the community. Reviewers will be specifically instructed to not penalize honesty concerning limitations.

### 3. Theory Assumptions and Proofs

Question: For each theoretical result, does the paper provide the full set of assumptions and a complete (and correct) proof?

Answer: [Yes]

Justification: All the hypothesis and proofs for Theorem 1 and Theorem 2 are clearly stated in the Appendix.

Guidelines:

- The answer NA means that the paper does not include theoretical results.
- All the theorems, formulas, and proofs in the paper should be numbered and cross-referenced.
- All assumptions should be clearly stated or referenced in the statement of any theorems.
- The proofs can either appear in the main paper or the supplemental material, but if they appear in the supplemental material, the authors are encouraged to provide a short proof sketch to provide intuition.
- Inversely, any informal proof provided in the core of the paper should be complemented by formal proofs provided in appendix or supplemental material.
- Theorems and Lemmas that the proof relies upon should be properly referenced.

#### 4. Experimental Result Reproducibility

Question: Does the paper fully disclose all the information needed to reproduce the main experimental results of the paper to the extent that it affects the main claims and/or conclusions of the paper (regardless of whether the code and data are provided or not)?

Answer: [Yes]

Justification: All the necessary information is in Table 2

Guidelines:

- The answer NA means that the paper does not include experiments.
- If the paper includes experiments, a No answer to this question will not be perceived well by the reviewers: Making the paper reproducible is important, regardless of whether the code and data are provided or not.
- If the contribution is a dataset and/or model, the authors should describe the steps taken to make their results reproducible or verifiable.
- Depending on the contribution, reproducibility can be accomplished in various ways. For example, if the contribution is a novel architecture, describing the architecture fully might suffice, or if the contribution is a specific model and empirical evaluation, it may be necessary to either make it possible for others to replicate the model with the same dataset, or provide access to the model. In general, releasing code and data is often one good way to accomplish this, but reproducibility can also be provided via detailed instructions for how to replicate the results, access to a hosted model (e.g., in the case of a large language model), releasing of a model checkpoint, or other means that are appropriate to the research performed.
- While NeurIPS does not require releasing code, the conference does require all submissions to provide some reasonable avenue for reproducibility, which may depend on the nature of the contribution. For example
  - (a) If the contribution is primarily a new algorithm, the paper should make it clear how to reproduce that algorithm.
  - (b) If the contribution is primarily a new model architecture, the paper should describe the architecture clearly and fully.
  - (c) If the contribution is a new model (e.g., a large language model), then there should either be a way to access this model for reproducing the results or a way to reproduce the model (e.g., with an open-source dataset or instructions for how to construct the dataset).
  - (d) We recognize that reproducibility may be tricky in some cases, in which case authors are welcome to describe the particular way they provide for reproducibility. In the case of closed-source models, it may be that access to the model is limited in some way (e.g., to registered users), but it should be possible for other researchers to have some path to reproducing or verifying the results.

## 5. Open access to data and code

Question: Does the paper provide open access to the data and code, with sufficient instructions to faithfully reproduce the main experimental results, as described in supplemental material?

Answer: [Yes]

Justification: We provide a copy of our code in the supplemental materials.

Guidelines:

- The answer NA means that paper does not include experiments requiring code.
- Please see the NeurIPS code and data submission guidelines (<https://nips.cc/public/guides/CodeSubmissionPolicy>) for more details.
- While we encourage the release of code and data, we understand that this might not be possible, so “No” is an acceptable answer. Papers cannot be rejected simply for not including code, unless this is central to the contribution (e.g., for a new open-source benchmark).
- The instructions should contain the exact command and environment needed to run to reproduce the results. See the NeurIPS code and data submission guidelines (<https://nips.cc/public/guides/CodeSubmissionPolicy>) for more details.
- The authors should provide instructions on data access and preparation, including how to access the raw data, preprocessed data, intermediate data, and generated data, etc.
- The authors should provide scripts to reproduce all experimental results for the new proposed method and baselines. If only a subset of experiments are reproducible, they should state which ones are omitted from the script and why.
- At submission time, to preserve anonymity, the authors should release anonymized versions (if applicable).
- Providing as much information as possible in supplemental material (appended to the paper) is recommended, but including URLs to data and code is permitted.

## 6. Experimental Setting/Details

Question: Does the paper specify all the training and test details (e.g., data splits, hyperparameters, how they were chosen, type of optimizer, etc.) necessary to understand the results?

Answer: [Yes]

Justification: See Table 2

Guidelines:

- The answer NA means that the paper does not include experiments.
- The experimental setting should be presented in the core of the paper to a level of detail that is necessary to appreciate the results and make sense of them.
- The full details can be provided either with the code, in appendix, or as supplemental material.

## 7. Experiment Statistical Significance

Question: Does the paper report error bars suitably and correctly defined or other appropriate information about the statistical significance of the experiments?

Answer: [Yes]

Justification: All the experiments were run with three different seeds.

Guidelines:

- The answer NA means that the paper does not include experiments.
- The authors should answer "Yes" if the results are accompanied by error bars, confidence intervals, or statistical significance tests, at least for the experiments that support the main claims of the paper.
- The factors of variability that the error bars are capturing should be clearly stated (for example, train/test split, initialization, random drawing of some parameter, or overall run with given experimental conditions).

- The method for calculating the error bars should be explained (closed form formula, call to a library function, bootstrap, etc.)
- The assumptions made should be given (e.g., Normally distributed errors).
- It should be clear whether the error bar is the standard deviation or the standard error of the mean.
- It is OK to report 1-sigma error bars, but one should state it. The authors should preferably report a 2-sigma error bar than state that they have a 96% CI, if the hypothesis of Normality of errors is not verified.
- For asymmetric distributions, the authors should be careful not to show in tables or figures symmetric error bars that would yield results that are out of range (e.g. negative error rates).
- If error bars are reported in tables or plots, The authors should explain in the text how they were calculated and reference the corresponding figures or tables in the text.

## 8. Experiments Compute Resources

Question: For each experiment, does the paper provide sufficient information on the computer resources (type of compute workers, memory, time of execution) needed to reproduce the experiments?

Answer: [Yes]

Justification: In Section 4 we specified the computational resources and the time was reported in Table 1.

Guidelines:

- The answer NA means that the paper does not include experiments.
- The paper should indicate the type of compute workers CPU or GPU, internal cluster, or cloud provider, including relevant memory and storage.
- The paper should provide the amount of compute required for each of the individual experimental runs as well as estimate the total compute.
- The paper should disclose whether the full research project required more compute than the experiments reported in the paper (e.g., preliminary or failed experiments that didn't make it into the paper).

## 9. Code Of Ethics

Question: Does the research conducted in the paper conform, in every respect, with the NeurIPS Code of Ethics <https://neurips.cc/public/EthicsGuidelines>?

Answer: [Yes]

Justification: We have reviewed the NeurIPS Code of Ethics and ensured that our research satisfies it.

Guidelines:

- The answer NA means that the authors have not reviewed the NeurIPS Code of Ethics.
- If the authors answer No, they should explain the special circumstances that require a deviation from the Code of Ethics.
- The authors should make sure to preserve anonymity (e.g., if there is a special consideration due to laws or regulations in their jurisdiction).

## 10. Broader Impacts

Question: Does the paper discuss both potential positive societal impacts and negative societal impacts of the work performed?

Answer: [Yes]

Justification: We included a brief discussion on the possible use of action-minimizing solvers in the study of population dynamics.

Guidelines:

- The answer NA means that there is no societal impact of the work performed.
- If the authors answer NA or No, they should explain why their work has no societal impact or why the paper does not address societal impact.

- Examples of negative societal impacts include potential malicious or unintended uses (e.g., disinformation, generating fake profiles, surveillance), fairness considerations (e.g., deployment of technologies that could make decisions that unfairly impact specific groups), privacy considerations, and security considerations.
- The conference expects that many papers will be foundational research and not tied to particular applications, let alone deployments. However, if there is a direct path to any negative applications, the authors should point it out. For example, it is legitimate to point out that an improvement in the quality of generative models could be used to generate deepfakes for disinformation. On the other hand, it is not needed to point out that a generic algorithm for optimizing neural networks could enable people to train models that generate Deepfakes faster.
- The authors should consider possible harms that could arise when the technology is being used as intended and functioning correctly, harms that could arise when the technology is being used as intended but gives incorrect results, and harms following from (intentional or unintentional) misuse of the technology.
- If there are negative societal impacts, the authors could also discuss possible mitigation strategies (e.g., gated release of models, providing defenses in addition to attacks, mechanisms for monitoring misuse, mechanisms to monitor how a system learns from feedback over time, improving the efficiency and accessibility of ML).

## 11. Safeguards

Question: Does the paper describe safeguards that have been put in place for responsible release of data or models that have a high risk for misuse (e.g., pretrained language models, image generators, or scraped datasets)?

Answer: [NA]

Justification: There is no foreseeable high risk for misuse.

Guidelines:

- The answer NA means that the paper poses no such risks.
- Released models that have a high risk for misuse or dual-use should be released with necessary safeguards to allow for controlled use of the model, for example by requiring that users adhere to usage guidelines or restrictions to access the model or implementing safety filters.
- Datasets that have been scraped from the Internet could pose safety risks. The authors should describe how they avoided releasing unsafe images.
- We recognize that providing effective safeguards is challenging, and many papers do not require this, but we encourage authors to take this into account and make a best faith effort.

## 12. Licenses for existing assets

Question: Are the creators or original owners of assets (e.g., code, data, models), used in the paper, properly credited and are the license and terms of use explicitly mentioned and properly respected?

Answer: [Yes]

Justification: We provide in the Appendix F the licences and terms of the benchmark codes.

Guidelines:

- The answer NA means that the paper does not use existing assets.
- The authors should cite the original paper that produced the code package or dataset.
- The authors should state which version of the asset is used and, if possible, include a URL.
- The name of the license (e.g., CC-BY 4.0) should be included for each asset.
- For scraped data from a particular source (e.g., website), the copyright and terms of service of that source should be provided.
- If assets are released, the license, copyright information, and terms of use in the package should be provided. For popular datasets, [paperswithcode.com/datasets](https://paperswithcode.com/datasets) has curated licenses for some datasets. Their licensing guide can help determine the license of a dataset.

- For existing datasets that are re-packaged, both the original license and the license of the derived asset (if it has changed) should be provided.
- If this information is not available online, the authors are encouraged to reach out to the asset's creators.

### 13. New Assets

Question: Are new assets introduced in the paper well documented and is the documentation provided alongside the assets?

Answer: [Yes]

Justification: We appropriately cited the code we used for our benchmarks.

Guidelines:

- The answer NA means that the paper does not release new assets.
- Researchers should communicate the details of the dataset/code/model as part of their submissions via structured templates. This includes details about training, license, limitations, etc.
- The paper should discuss whether and how consent was obtained from people whose asset is used.
- At submission time, remember to anonymize your assets (if applicable). You can either create an anonymized URL or include an anonymized zip file.

### 14. Crowdsourcing and Research with Human Subjects

Question: For crowdsourcing experiments and research with human subjects, does the paper include the full text of instructions given to participants and screenshots, if applicable, as well as details about compensation (if any)?

Answer: [NA]

Justification: No crowdsourcing or research with human resources.

Guidelines:

- The answer NA means that the paper does not involve crowdsourcing nor research with human subjects.
- Including this information in the supplemental material is fine, but if the main contribution of the paper involves human subjects, then as much detail as possible should be included in the main paper.
- According to the NeurIPS Code of Ethics, workers involved in data collection, curation, or other labor should be paid at least the minimum wage in the country of the data collector.

### 15. Institutional Review Board (IRB) Approvals or Equivalent for Research with Human Subjects

Question: Does the paper describe potential risks incurred by study participants, whether such risks were disclosed to the subjects, and whether Institutional Review Board (IRB) approvals (or an equivalent approval/review based on the requirements of your country or institution) were obtained?

Answer: [NA]

Justification: No participants used.

Guidelines:

- The answer NA means that the paper does not involve crowdsourcing nor research with human subjects.
- Depending on the country in which research is conducted, IRB approval (or equivalent) may be required for any human subjects research. If you obtained IRB approval, you should clearly state this in the paper.
- We recognize that the procedures for this may vary significantly between institutions and locations, and we expect authors to adhere to the NeurIPS Code of Ethics and the guidelines for their institution.
- For initial submissions, do not include any information that would break anonymity (if applicable), such as the institution conducting the review.

761  
762  
763  
764  
765  
766  
767  
768  
769  
770  
771  
772

## 16. Declaration of LLM usage

Question: Does the paper describe the usage of LLMs if it is an important, original, or non-standard component of the core methods in this research? Note that if the LLM is used only for writing, editing, or formatting purposes and does not impact the core methodology, scientific rigorousness, or originality of the research, declaration is not required.

Answer:[NA]

Justification: Our research does not involve LLMs.

Guidelines:

- The answer NA means that the core method development in this research does not involve LLMs as any important, original, or non-standard components.
- Please refer to our LLM policy (<https://neurips.cc/Conferences/2025/LLM>) for what should or should not be described.

## 773 A Deterministic and SOC problems

774 We now show the equivalence of

$$\begin{aligned} & \inf_{\rho(t,x), v(t,x)} \int_0^1 \int_{\mathbb{R}^d} \frac{1}{2} \|v(t,x)\|^2 \rho(t,x) dx + F(\rho(t)) + \mathcal{FI}(\rho(t)) dt \\ & \text{subject to } \partial_t \rho + \nabla \cdot (\rho v) = 0, \quad \rho(0, \cdot) = \rho_0, \quad \rho(1, \cdot) = \rho_1, \end{aligned} \quad (17)$$

775 and

$$\begin{aligned} & \inf_{\rho(t,x), u(t,x)} \int_0^1 \int_{\mathbb{R}^d} \frac{1}{2} \|u(t,x)\|^2 \rho(t,x) dx + F(\rho(t)) dt \\ & \text{subject to } \partial_t \rho + \nabla \cdot (\rho u) = \frac{\sigma^2}{2} \Delta \rho, \quad \rho(0, \cdot) = \rho_0, \quad \rho(1, \cdot) = \rho_1. \end{aligned} \quad (18)$$

776 *Proof.* In what follows, we use the notation  $\delta_\rho$  for the  $L^2$  gradient.

777 Let  $S$  be a Lagrange multiplier for (17), then KKT conditions for (17) are given by

$$\begin{aligned} v &= \nabla S - \rho, \quad \text{a.e.} \\ \partial_t S + \frac{1}{2} \|\nabla S\|^2 &= -\delta_\rho F(\rho) - \delta_\rho \mathcal{FI}(\rho), \\ \partial_t \rho + \nabla \cdot (\rho v) &= 0. \end{aligned}$$

778 Define  $\Phi = S + \sigma^2/2 \log \rho$ , and  $u := \nabla \Phi$ ,  $\rho$  a.e. Then the pair  $(\rho, u)$  satisfies

$$\begin{aligned} u &= \nabla \Phi, \quad \rho \text{ a.e.} \\ \partial_t \Phi + \frac{1}{2} \|\nabla \Phi\|^2 &= -\delta_\rho F(\rho), \\ \partial_t \rho + \nabla \cdot (\rho u) &= \frac{\sigma^2}{2} \Delta \rho, \end{aligned}$$

779 which is in turn the KKT conditions of the optimization problem (18).  $\square$

## 780 B Equivalence of dynamic and static frameworks

781 Here we show the equivalence between

$$\begin{aligned} & \inf_{\rho(t,x), v(t,x)} \int_0^1 \int_{\mathbb{R}^d} \frac{1}{2} \|v(t,x)\|^2 \rho(t,x) dx + F(\rho(t)) dt \\ & \text{subject to } \partial_t \rho + \nabla \cdot (\rho v) = 0, \quad \rho(0, \cdot) = \rho_0, \quad \rho(1, \cdot) = \rho_1, \end{aligned}$$

782 and

$$\inf_{\pi \in \tilde{\Pi}(\rho_0, \rho_1)} c(\pi) = \inf_{\pi \in \tilde{\Pi}(\rho_0, \rho_1)} \inf_{\gamma \in \Gamma(\pi)} \mathcal{A}(\gamma).$$

783 *Proof.* Observe that a local minimizer of (6)  $(\rho, v)$  defines a  $C^1$ -diffeomorphic curve  $\gamma_{\rho,v}$  as the flow

$$\gamma(t, x) = x + \int_0^t v(s, \gamma(s, x)) ds,$$

784 and the coupling  $\pi_{\rho,v} = (x, \gamma(1, x))$ . The coupling  $\pi_{\rho,v}$  and path  $\gamma_{\rho,v}$  are an admissible pair for (11).

785 From the definition of  $\gamma_{\rho,v}$ , it follows that  $\rho_{\gamma_{\rho,v}(t)} = (\gamma_{\rho,v}(t))_\#(\rho_0) = \rho$ , and

$$\int_0^1 \int_{\mathbb{R}^d} \frac{1}{2} \|v(t,x)\|^2 \rho(t,x) dx dt = \mathcal{A}(\gamma_{\rho,v}),$$

786 then

$$\int_0^1 \int_{\mathbb{R}^d} \frac{1}{2} \|v(t,x)\|^2 \rho(t,x) dx + F(\rho) dt = \mathcal{A}(\gamma_{\rho,v}) + \int_0^1 F(\rho_{\gamma,v}) dt.$$



Thus (6) upper bounds (11). Now, given a local minimizer of (11)  $(\pi, \gamma)$ , the density  $\rho_{\pi, \gamma}(t, \cdot) = (\gamma_t(\cdot))_{\#}(\rho_0)$  and the velocity field

$$v(t, \gamma(t, x)) = \frac{d}{dt} \gamma(t, x), \quad \gamma(0, x) = x \sim \rho_0,$$

define an admissible pair of (6). As before,

$$\mathcal{A}(\gamma) + \int_0^1 F(\rho_\gamma) dt = \int_0^1 \int_{\mathbb{R}^d} \frac{1}{2} \|v_{\pi, \gamma}(t, x)\|^2 \rho_{\pi, \gamma}(t, x) dx + F(\rho_{\pi, \gamma}) dt.$$

Thus, (11) upper bounds (6).  $\square$

## C Wassertein error bounds for interpolation

**Theorem 3.** Assume that  $T$  is Lipschitz in its second variable with a constant  $C$ , in the sense,  $\forall z \in \mathbb{R}^d$  and any  $\theta, \tilde{\theta} \in \mathbb{R}^D$ ,

$$\|T(z, \theta) - T(z, \tilde{\theta})\| \leq C \|\theta - \tilde{\theta}\|,$$

then

$$W_2(\rho_\theta, \rho_{\tilde{\theta}}) \leq C \|\theta - \tilde{\theta}\|. \quad (19)$$

*Proof.* From the static definition of the Wasserstein distance Equation (3), we have

$$W_2(\rho_\theta, \rho_{\tilde{\theta}}) \leq \left( \int_{\mathbb{R}^d} \|T(z, \theta) - T(z, \tilde{\theta})\|^2 \lambda(z) dz \right)^{1/2} \leq C \|\theta - \tilde{\theta}\|.$$

$\square$

We recognize that  $T$  being Lipschitz in the above sense is strong. We leave for future research, relaxing it to locally Lipschitz, a more feasible condition.

**Corollary 1.** Let  $\theta_{0 \rightarrow 1}$  and  $\tilde{\theta}_{0 \rightarrow 1}$  denote two curves in the parameter space. Following the hypothesis on Theorem 3, it follows that  $\forall t \in [0, 1]$

$$W_2(\rho_{\theta(t)}, \rho_{\tilde{\theta}(t)}) \leq C \|\theta(t) - \tilde{\theta}(t)\|.$$

**Corollary 2.** Let  $\theta_{0 \rightarrow 1}$  be a curve in parameter space with continuous derivatives up to order  $l \geq 1$ , and let  $\tilde{\theta}_{0 \rightarrow 1}$  be the piecewise cubic Hermite spline interpolation of  $\theta(t)$  at  $K$  uniformly spaced points  $\{t_i = \frac{i}{K+1}\}_{i=0}^{K+1}$ . Define  $\kappa := \min(l, 4)$ , then

$$\|\theta_{0 \rightarrow 1} - \tilde{\theta}_{0 \rightarrow 1}\| \leq M_\kappa \cdot h^\kappa \max_{\xi \in [0, 1]} \|\theta^{(\kappa)}(\xi)\|,$$

where  $h = \frac{1}{K+1}$  and  $M_\kappa$  is a constant depending on  $\kappa$ . With  $\theta^{(\kappa)}$ , the  $\kappa$  derivative of the path  $\theta(t)$ . Furthermore for all  $t \in [0, 1]$ , the Wasserstein distance between the density paths at time  $t$  is given by

$$W_2(\rho_{\theta(t)}, \rho_{\tilde{\theta}(t)}) \leq C \cdot M_\kappa \cdot h^\kappa \max_{\xi \in [0, 1]} \|\theta^{(\kappa)}(\xi)\|,$$

where  $C$  is the Lipschitz constant from Theorem 3.

**Theorem 4.** Let  $\theta_{0 \rightarrow 1}$  be a curve in parameter space with continuous derivatives up to order  $l \geq 2$ , and let  $\tilde{\theta}_{0 \rightarrow 1}$  be the cubic Hermite spline interpolation of  $\theta(t)$  at  $K$  uniformly spaced points  $\{t_i = \frac{i}{K+1}\}_{i=0}^{K+1}$ . Define  $\kappa := \min(l, 4)$ .

Assume that:

1.  $F$  is Lipschitz with respect to the Wasserstein-2 distance with constant  $M_F$ .
2.  $\|\partial_\theta T(z, \theta)\| < M_{\partial_\theta T}$ , for some constant  $M_{\partial_\theta T}$  for all  $z$  and  $\theta$ .
3.  $\partial_\theta T(z, \theta)$  is Lipschitz continuous in  $\theta$  for all  $z$  with Lipschitz constant  $C_{\partial_\theta}$ .

814 4.  $\|\theta'(t)\| < M_{\theta'}, \text{ for some constant } M_{\partial_{\theta}}, \text{ for all } t \in [0, 1].$

815 Then the error in the action functional is bounded by:

$$|A[\theta_{0 \rightarrow 1}] - A[\tilde{\theta}_{0 \rightarrow 1}]| \leq |A[\theta_{0 \rightarrow 1}] - A[\tilde{\theta}_{0 \rightarrow 1}]| \leq M_{\partial_{\theta} T} (M_{\theta'} + M_{\tilde{\theta}'}) M_{\partial_{\theta} T} M_{\kappa-1} \max_{\xi \in [0,1]} \|\theta^{(\kappa)}(\xi)\| h^{\kappa-1} = C_{\mathcal{A}} h^{\kappa-1}$$

816 where  $h = \frac{1}{K+1}$ .

817 *Proof.* We split the proof into two parts, one part on a bound for the kinetic energy term, and the  
 818 other on a bound for the potential energy term. The bound for the potential energy follows from the  
 819 Lipschitz continuity and Corollary 1

$$\int_0^1 |F(\rho_{\theta(t)}) - F(\rho_{\tilde{\theta}(t)})| dt \leq \int_0^1 M_F W_2(\rho_{\theta(t)}, \rho_{\tilde{\theta}(t)}) dt \leq M_F M_{\kappa} \cdot h^{\kappa} \max_{\xi \in [0,1]} \|\theta^{(\kappa)}(\xi)\|.$$

820 The bound for the kinetic energy can be derived as

$$\begin{aligned} & \int_0^1 \left| \mathbb{E}_{z \sim \lambda} \left\| \frac{d}{dt} x_{\theta(t)}(z) \right\|^2 - \mathbb{E}_{z \sim \lambda} \left\| \frac{d}{dt} x_{\tilde{\theta}(t)}(z) \right\|^2 \right| dt \\ & \leq \int_0^1 \mathbb{E}_{z \sim \lambda} \left| \left\| \frac{d}{dt} x_{\theta(t)}(z) \right\|^2 - \left\| \frac{d}{dt} x_{\tilde{\theta}(t)}(z) \right\|^2 \right| dt \\ & \leq \int_0^1 \mathbb{E}_{z \sim \lambda} \left[ \left( \left\| \frac{d}{dt} x_{\theta(t)}(z) \right\| + \left\| \frac{d}{dt} x_{\tilde{\theta}(t)}(z) \right\| \right) \left\| \frac{d}{dt} x_{\theta(t)}(z) - \frac{d}{dt} x_{\tilde{\theta}(t)}(z) \right\| \right] dt \\ & \leq \int_0^1 \mathbb{E}_{z \sim \lambda} \left[ \left( \|(\partial_{\theta} T)(z, \theta(t))\| \|\theta'(t)\| + \|(\partial_{\theta} T)(z, \tilde{\theta}(t))\| \|\tilde{\theta}'(t)\| \right) \cdot \dots \right. \\ & \quad \cdot \|(\partial_{\theta} T)(z, \theta(t))\theta'(t) - (\partial_{\theta} T)(z, \tilde{\theta}(t))\tilde{\theta}'(t)\| \Big] dt \\ & \leq (M_{\partial_{\theta} T} M_{\theta'} + M_{\partial_{\theta} T} M_{\tilde{\theta}'}) \int_0^1 \mathbb{E}_{z \sim \lambda} \|(\partial_{\theta} T)(z, \theta(t))\theta'(t) - (\partial_{\theta} T)(z, \tilde{\theta}(t))\tilde{\theta}'(t)\| dt \\ & = M_{\partial_{\theta} T} (M_{\theta'} + M_{\tilde{\theta}'}) \int_0^1 \mathbb{E}_{z \sim \lambda} \|(\partial_{\theta} T)(z, \theta(t))\theta'(t) - (\partial_{\theta} T)(z, \tilde{\theta}(t))\tilde{\theta}'(t)\| dt \\ & \leq M_{\partial_{\theta} T} (M_{\theta'} + M_{\tilde{\theta}'}) \int_0^1 \mathbb{E}_{z \sim \lambda} \left[ \|(\partial_{\theta} T)(z, \theta(t))\theta'(t) - (\partial_{\theta} T)(z, \theta(t))\tilde{\theta}'(t)\| + \dots \right. \\ & \quad \left. + \|(\partial_{\theta} T)(z, \theta(t))\tilde{\theta}'(t) - (\partial_{\theta} T)(z, \tilde{\theta}(t))\tilde{\theta}'(t)\| \right] dt \\ & \leq M_{\partial_{\theta} T} (M_{\theta'} + M_{\tilde{\theta}'}) \int_0^1 \mathbb{E}_{z \sim \lambda} \left[ \|(\partial_{\theta} T)(z, \theta(t))\| \|\theta'(t) - \tilde{\theta}'(t)\| + \dots \right. \\ & \quad \left. + \|(\partial_{\theta} T)(z, \theta(t)) - (\partial_{\theta} T)(z, \tilde{\theta}(t))\| \|\tilde{\theta}'(t)\| \right] dt \\ & \leq M_{\partial_{\theta} T} (M_{\theta'} + M_{\tilde{\theta}'}) \int_0^1 \left[ M_{\partial_{\theta} T} \|\theta'(t) - \tilde{\theta}'(t)\| + C_{\partial_{\theta}} \|\theta(t) - \tilde{\theta}(t)\| \|\tilde{\theta}'(t)\| \right] dt \\ & \leq M_{\partial_{\theta} T} (M_{\theta'} + M_{\tilde{\theta}'}) \left[ M_{\partial_{\theta} T} M_{\kappa-1} h^{\kappa-1} + C_{\partial_{\theta}} M_{\kappa} h^{\kappa} M_{\tilde{\theta}'} \right] \max_{\xi \in [0,1]} \|\theta^{(\kappa)}(\xi)\| \end{aligned}$$

821 This implies

$$\begin{aligned} |A[\theta_{0 \rightarrow 1}] - A[\tilde{\theta}_{0 \rightarrow 1}]| & \leq M_{\partial_{\theta} T} (M_{\theta'} + M_{\tilde{\theta}'}) \left[ M_{\partial_{\theta} T} M_{\kappa-1} h^{\kappa-1} + C_{\partial_{\theta}} M_{\kappa} h^{\kappa} M_{\tilde{\theta}'} \right] \max_{\xi \in [0,1]} \|\theta^{(\kappa)}(\xi)\| + \dots \\ & \quad + M_F M_{\kappa} \cdot h^{\kappa} \max_{\xi \in [0,1]} \|\theta^{(\kappa)}(\xi)\|. \end{aligned}$$

822 The term that dominates the last expression is

$$M_{\partial_{\theta} T} (M_{\theta'} + M_{\tilde{\theta}'}) M_{\partial_{\theta} T} M_{\kappa-1} \max_{\xi \in [0,1]} \|\theta^{(\kappa)}(\xi)\| h^{\kappa-1},$$

823 and we can conclude

$$|A[\theta_{0 \rightarrow 1}] - A[\tilde{\theta}_{0 \rightarrow 1}]| \leq M_{\partial_\theta T}(M_{\theta'} + M_{\tilde{\theta}'})M_{\partial_\theta T}M_{\kappa-1} \max_{\xi \in [0,1]} \|\theta^{(\kappa)}(\xi)\| h^{\kappa-1}$$

824

□

825 We recognize that hypothesis 1 on Theorem 4, which requires  $F$  to be Lipschitz with respect to the  $W_2$   
 826 metric, is a strong assumption for general functionals  $F$ . When  $F$  consists of linear potentials and  
 827 bilinear interaction potentials whose corresponding  $V(x)$  and  $W(x-y)$  are Lipschitz continuous with  
 828 constants  $M_V$  and  $M_W$ , the functional  $F(\rho) = \int_{\mathbb{R}^d} V(x)\rho(x)dx + \int_{\mathbb{R}^d \times \mathbb{R}^d} W(x-y)\rho(x)\rho(y)dx dy$   
 829 is also Lipschitz. To show this, let  $\mu, \nu \in \mathcal{P}(\mathbb{R}^d)$  and  $T_{\mu \rightarrow \nu}$  the Monge map between them, then

$$\begin{aligned} |F(\mu) - F(\nu)| &= \\ &= |\mathbb{E}_{X \sim \mu}[V(X)] + \mathbb{E}_{X \sim \mu} \mathbb{E}_{Y \sim \mu}[W(X-Y)] - (\mathbb{E}_{X \sim \nu}[V(X)] + \mathbb{E}_{X \sim \nu} \mathbb{E}_{Y \sim \nu}[W(X-Y)])| \\ &\leq \mathbb{E}_{X \sim \mu} |V(X) - V(T_{\mu \rightarrow \nu}(X))| + \mathbb{E}_{X \sim \mu} \mathbb{E}_{Y \sim \mu} |W(X-Y) - W(T_{\mu \rightarrow \nu}(X) - T_{\mu \rightarrow \nu}(Y))| \\ &\leq (M_V + 2M_W)W_2(\mu, \nu). \end{aligned}$$

830 Observe that the last inequality follows from using the Lipschitz condition on  $V$  and  $W$ , and the  
 831 following application of Hölder inequality,

$$\mathbb{E}_{X \sim \mu} [|X - T_{\mu \rightarrow \nu}(X)|] \leq (\mathbb{E}_{X \sim \mu} [|X - T_{\mu \rightarrow \nu}(X)|^2])^{1/2} (\mathbb{E}_{X \sim \mu} [1^2])^{1/2} = (\mathbb{E}_{X \sim \mu} [|X - T_{\mu \rightarrow \nu}(X)|^2])^{1/2}.$$

## 832 D NODEs

833 See [8] for the standard reference on NODEs. For the NODE

$$\frac{d\psi(\tau, z)}{d\tau} = v_\theta(\tau, \psi(\tau, z)), \quad \psi(0, z) = z \sim \lambda,$$

834 initialized at  $\rho(0, z) \sim \mathcal{N}(0, I)$ , let  $\rho(\tau, \cdot) := \psi(\tau, \cdot)_\# \lambda$ , then

$$\begin{aligned} \frac{d}{d\tau} \log(\rho(\tau, x))|_{x=\psi(\tau, z)} &= -\nabla \cdot v_\theta(\tau, \psi(\tau, z)), & (20) \\ \text{and } \frac{d(\nabla_x \log \rho(\tau, x))}{d\tau}|_{x=\psi(\tau, z)} &= -\nabla(\nabla \cdot v_\theta(\tau, \psi(\tau, z))) \\ &\quad - (\nabla v_\theta(\tau, \psi(\tau, z)))^T \nabla_x \log \rho(\tau, x)|_{x=\psi(\tau, z)} & (21) \end{aligned}$$

835 with initial conditions  $\log(\rho(0, z)) = \log(\rho_{\mathcal{N}}(z))$ , where  $\rho_{\mathcal{N}}(z)$  is the density of a standard normal  
 836 distribution, and  $\nabla_x \log \rho(0, x)|_{x=z} = -z$  respectively. Although it is not necessary to use a  
 837 Gaussian density for the initial condition, it is common in the literature, these quantities might not be  
 838 accessible for other densities.

839 The result for (20) is standard and we do not include the proof here. Although Equation (21) has been  
 840 proved before, see e.g., [34], we provide a proof for completeness.

841 *Proof.* For this proof, we assume  $\rho(\tau, x)$  has continuous second-order derivatives with respect to  $\tau$   
 842 and  $x$ . In what follows, we use the short hand notation  $\psi$  to indicate  $\psi(\tau, z)$ , and  $v$  instead of  $v_\theta$ .

$$\begin{aligned} \frac{d}{d\tau} \nabla_x \log(\rho) &= \partial_\tau \nabla_x \log(\rho) + \nabla_x^2 \log(\rho) v \\ &= \nabla_x \rho^{-1} \partial_\tau \rho + \nabla_x^2 \log(\rho) v \\ &= -\nabla_x \rho^{-1} \nabla \cdot (\rho v) + \nabla_x^2 \log(\rho) v \\ &= -\nabla_x (\nabla_x \log(\rho))^T v + \nabla_x \cdot v + \nabla_x^2 \log(\rho) v \\ &= -\nabla_x v^T \log(\rho) - \nabla_x (\nabla_x \cdot v). \end{aligned}$$

843 The first equality follows from the dynamical system  $\frac{d\psi}{d\tau} = v(\tau, \psi(\tau, z))$ , the third equality follows  
 844 from the continuity equation  $\partial_\tau \rho = -\nabla \cdot (\rho v)$ , and the fourth equality from  $\rho^{-1} \nabla_x \rho = \nabla_x \log(\rho)$ .  
 845 □

## 846 E Algorithms/Implementation details

847 We use two separate optimizers: one for the boundary conditions  $(\theta_0, \theta_1)$  (Algorithm 2) and another  
 848 for the control points  $\{\theta_{t_i}\}_{i=1}^K$  (Algorithm 1). We use Adam optimizers [25] in both cases. For the  
 849 learning rate scheduler, we used StepLR or cosine, with specifics provided for each experiment.

850 A key implementation challenge is preserving PyTorch’s computational graph. Specifically, the  
 851 ‘torch.load’ operation does not retain the graph for gradient-based optimization. This is particularly  
 852 problematic in Algorithm 1, where the interpolated points  $\theta(t_j)$  used in the trapezoidal integration  
 853 must track the computational graph with the spline control points to enable proper gradient flow  
 854 during optimization. When ‘torch.load’ is used to assign models, this computational graph is lost,  
 855 disconnecting the density path from the control point optimization.

856 To address this issue, we re-implemented the MLP architecture from scratch, passing weights and  
 857 biases as explicit function arguments rather than storing them as internal model parameters. While  
 858 effective, this approach introduces limitations to architectural flexibility: testing new network archi-  
 859 tectures requires either hard-coding them or developing alternative methods to preserve computational  
 860 graphs when loading pre-trained models. We leave overcoming this limitation to future research.

---

### Algorithm 1 Path optimization

---

**Require:** Parametric points  $\{\theta_{t_i}\}_{i=0}^{K+1}$ , potential function  $F$ ,  $N$  samples  $\{z_i\}_{i=1}^M \sim \lambda$ , number of optimization steps  $Q_1$ .

- 1: Initialize spline in parameter space with  $\{\theta_{t_i}\}_{i=0}^{K+1}$ .
  - 2: **for** number of iterations  $Q_1$  **do**
  - 3:   Obtain  $\{\theta(t_j)\}_{j=0}^N$  by evaluating the current spline at time steps  $t_j = \frac{j}{N}$ .
  - 4:   Evaluate the  $N + 1$  pusforwards  $\{T_{\theta(t_j)}(z_i)\}_{i=0,j=1}^{N,M}$ .
  - 5:   **if** Entropy or Fisher Information **then**
  - 6:     Obtain entropy Equation (20) score from (21).
  - 7:   **end if**
  - 8:   Evaluate the Equation (12) by integrating in time by trapezoidal rule and evaluating the expectations via Monte Carlo.
  - 9:   Update weights  $\{\theta_{t_i}\}_{i=1}^K$  via gradient descent.
  - 10: **end for**
  - 11: **return**  $\{\theta_{t_i}\}_{i=1}^K$
- 

---

### Algorithm 2 Coupling optimization

---

**Require:** Sampling function from  $\rho_0$ , sampling function from  $\rho_1$ , potential function  $F$ , control points  $\{\theta_{t_i}\}_{i=0}^{K+1}$ , weights  $\alpha_0, \alpha_1$ , samples  $\{z_k\}_{k=1}^M \sim \lambda$ , number of optimization steps  $Q_2$ .

- 1: **for** number of iterations  $Q_2$  **do**
  - 2:   Sample  $M$  points from  $\{x_0^k\}_{k=1}^M \sim \rho_0$ , and  $\{x_1^k\}_{k=1}^M \sim \rho_1$ .
  - 3:   Evaluate  $\ell = \sum_{j=0}^1 \frac{1}{M} \left[ \sum_{k=1}^M \alpha_j L((T_{\theta_j}(z_k), x_j^k)) \right]$ .
  - 4:   Obtain  $\{\theta(t_j)\}_{j=0}^N$  by evaluating the current spline at time steps  $t_j = \frac{j}{N}$ .
  - 5:   Evaluate the  $N + 1$  pusforwards  $\{T_{\theta(t_j)}(z_k)\}_{i=0,k=1}^{N,M}$ .
  - 6:   **if** Entropy or Fisher Information **then**
  - 7:     Obtain entropy Equation (20) score from (21).
  - 8:   **end if**
  - 9:   Evaluate the Equation (12) by integrating in time by trapezoidal rule and evaluating the expectations via Monte Carlo.
  - 10:   Update  $\theta_0, \theta_1$  by minimizing (16) via gradient descent.
  - 11: **end for**
  - 12: **return**  $\theta_0, \theta_1$
-

---

**Algorithm 3** PDPO

---

**Require:** Sampling function for  $\rho_0$ , sampling function for  $\rho_1$ , reference density  $\lambda$  potential function  $F$ , number of control points  $K$ , weights  $\alpha_0, \alpha_1$ , initialized  $\theta_0, \theta_1$ , number of total iterations  $Q$ , number of path optimization steps  $Q_1$ , number of coupling optimization steps  $Q_2$ , number of geodesic-warmup steps  $Q_3$ .

- 1: Initialize  $\theta_{t_i}$  using an equispace linear interpolation of  $\theta_0$  and  $\theta_1$ .
- 2: Run  $Q_3$  steps of geodesic warmup.
- 3: **for** number of iterations  $Q$  **do**
- 4:   Sample  $M$  points  $\{z_i\}_{i=1}^M \sim \lambda$ ,
- 5:   Update  $\{\theta_{t_i}\}_{i=1}^K$  by minimizing the action of the points  $\{z_i\}_{i=1}^M$  using Algorithm 1.
- 6:   Update  $(\theta_0, \theta_1)$  using the points  $\{z_i\}_{i=1}^M$  in Algorithm 2.
- 7: **end for**
- 8: **return**  $\{\theta_{t_i}\}_{i=0}^{K+1}$ .

---

## F Additional Numerical Results

In this subsection, we report all the experimental details. In Table 2 we report the hyperparameters for the algorithms and the boundary conditions for each problem. The notation  $[x,y,z]$  in Table 2 defines the architecture of the networks,  $x$  is the input dimension,  $y$  is the number of neurons per layer, and  $z$  is the number of layers. We assumed the value of the constants  $\alpha_0 = \alpha_1$  in Algorithm 2, which we report as  $\alpha$  in Table 2.

Here we report that [19] is under CC BY-NC licence, [28] is under CC BY-NC 4.0 License, and [16] has no license.

### F.1 Pre-training strategy

Our framework can use pre-trained parameters  $\theta_0$  and  $\theta_1$  for the boundary conditions  $\rho_0$  and  $\rho_1$ , respectively. To pre-train a parameter, we use Flow Matching (FM) [17] to learn a velocity field to sample from a dataset. The choice of training framework for the boundary parameters motivates to adopt the FM loss function as our dissimilarity metric  $L$ . As demonstrated by [6], the FM loss function provides an upper bound on the  $W_2$  distance between the target density and the pushforward density. Therefore, minimizing the FM loss function guarantees the feasibility criteria. The simulation-free training scheme of FM offers a computationally efficient method for pretraining boundary conditions and guaranteeing the feasibility of the boundaries throughout the density path optimization algorithm. In Figure 5a we show the pushforward of the spline obtained from initializing all the control points at  $\mathbf{0}$ . In Figure 5b we show the resulting optimized path using the PDPO strategy. The running time for this case is 24 m 32s, leading to an action value of 40.31. Since the collocation points are initialized to  $\mathbf{0}$ , we did not use a geodesic-warmup. Compare this solution with the one reported in Section 4.2.

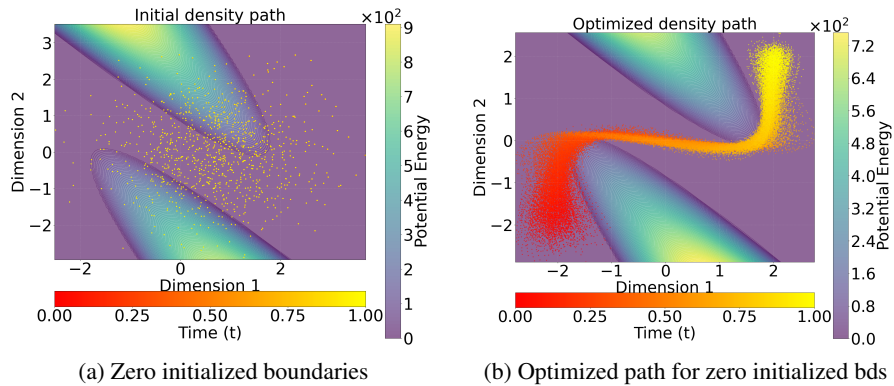

Figure 5: No pertaining for  $\theta_0$  and  $\theta_1$ .

We emphasize that once a set of parameters  $\theta$  has been retained to sample from a density, these parameters can be effectively reused as initialization for a wide range of related problems with any other boundary conditions and any potential energy terms. We consider the pre-training phase as a one-time investment and therefore do not include its computational cost when evaluating the runtime efficiency of our algorithm.

## F.2 Geodesic warmup

In the geodesic warmup, we optimize the linearly initialized control points using Algorithm 1 with  $F(\rho) = 0$ . This approach effectively reduces the computational cost of our algorithm. As we show in Figure 6, using a geodesic warmup drastically improves the speed of convergence and allows PDPO to reach a lower local minimum in the s-curve example.

To reduce the computational cost of the geodesic warmup, we consider at most  $N = 15$  points for the trapezoidal rule. The solution computed without geodesic warmup took 5m 32ss, whereas the solution with geodesic warmup took 5m 57s. Thus, the computational overhead of the geodesic warmup is negligible.

In Figure 7, we show a comparison of a solution without geodesic warmup (Figures 7a and 7b) and with geodesic warmup (Figures 7c and 7d).

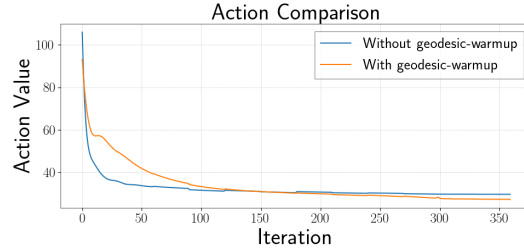

Figure 6: Comparison of action for solutions with and without geodesic warmup.

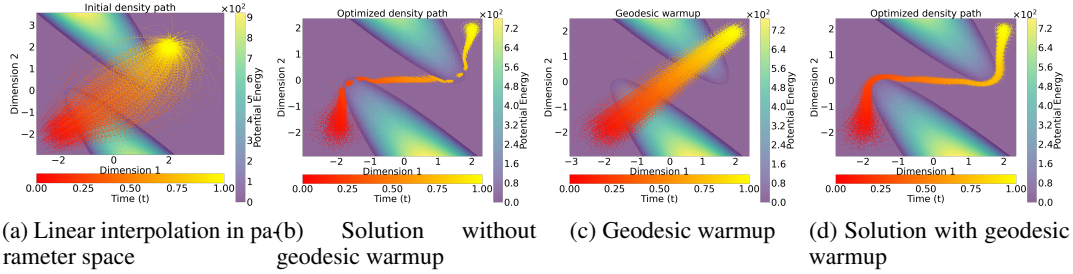

Figure 7: Comparison of solutions with and without geodesic warmup.

## F.3 Ablation Control Points

In Figure 8 we can see the comparison of the difference in the solution obtained by PDPO when varying the number of control points  $K$ . As we can see, when the number of control points increases, the quality of the solution also increases. Observe that the transition between the obstacles is smoother as the number of control points increases.

## F.4 Obstacle Avoidance with Mean Field Interactions

Here we provide the definitions for the entropy  $\mathcal{E}(\rho)$  and congestion potential  $\mathcal{C}(\rho)$ ,

$$\mathcal{E}(\rho) = \int_{\mathbb{R}^d} \log(\rho) \rho dx \quad \text{and} \quad \mathcal{C}(\rho) = \int_{\mathbb{R}^{d \times d}} \frac{2}{\|x - y\|^2} \rho(x) \rho(y) dx dy.$$

Table 2: Experimental set-up

|                                  | GMM                           | V-neck                                    | S-tunnel                                 | Opinion                                                             |                                                                                     |
|----------------------------------|-------------------------------|-------------------------------------------|------------------------------------------|---------------------------------------------------------------------|-------------------------------------------------------------------------------------|
| d                                | 2                             | 2                                         | 2                                        | 2                                                                   | 1000                                                                                |
| K                                | 5                             | 3                                         | 5                                        | 3                                                                   | 3                                                                                   |
| N                                | 30                            | 60                                        | 30                                       | 20                                                                  | 20                                                                                  |
| M                                | 1000                          | 1000                                      | 1000                                     | 1000                                                                | 5000                                                                                |
| Architecture                     | [2,256,4]                     | [2,128,4]                                 | [2,64,4]                                 | [2,128,4]                                                           | [1000,128,4]                                                                        |
| Epochs                           | 15                            | 15                                        | 18                                       | 10                                                                  | 10                                                                                  |
| Coupling opt steps               | 20                            | 20                                        | 20                                       | 20                                                                  | 20                                                                                  |
| Path opt. steps                  | 30                            | 20                                        | 30                                       | 20                                                                  | 20                                                                                  |
| Geodesic warmup steps            | 100                           | 100                                       | 100                                      | 200                                                                 | 200                                                                                 |
| $\alpha$                         | 100000                        | 100000                                    | 100000                                   | 100000                                                              | 10000                                                                               |
| $(\kappa_0, \kappa_1, \kappa_2)$ | (100, 0, 5)                   | (3000, 50, 0)                             | (50, 0, 0)                               | (0, 50, 0)                                                          | (0, 50, 0)                                                                          |
| Mean $\rho_0$                    | $e^{16i\pi}, i = 0, \dots, 7$ | $\begin{bmatrix} -11 \\ -1 \end{bmatrix}$ | $\begin{bmatrix} -2 \\ -2 \end{bmatrix}$ | <b>0</b>                                                            | <b>0</b>                                                                            |
| Mean $\rho_1$                    | $e^{8i\pi}, i = 0, \dots, 3$  | $\begin{bmatrix} 11 \\ 1 \end{bmatrix}$   | $\begin{bmatrix} 2 \\ 2 \end{bmatrix}$   | <b>0</b>                                                            | <b>0</b>                                                                            |
| Covariance of $\rho_0$           | <b>I</b>                      | <b>0.5I</b>                               | <b>0.1I</b>                              | $\text{diag}\left(\begin{bmatrix} 0.5 \\ 0.25 \end{bmatrix}\right)$ | $\text{diag}\left(\begin{bmatrix} 4 \\ 0.25 \\ \vdots \\ 0.25 \end{bmatrix}\right)$ |
| Covariance of $\rho_1$           | <b>I</b>                      | <b>0.5I</b>                               | <b>0.01I</b>                             | <b>3I</b>                                                           | <b>3I</b>                                                                           |

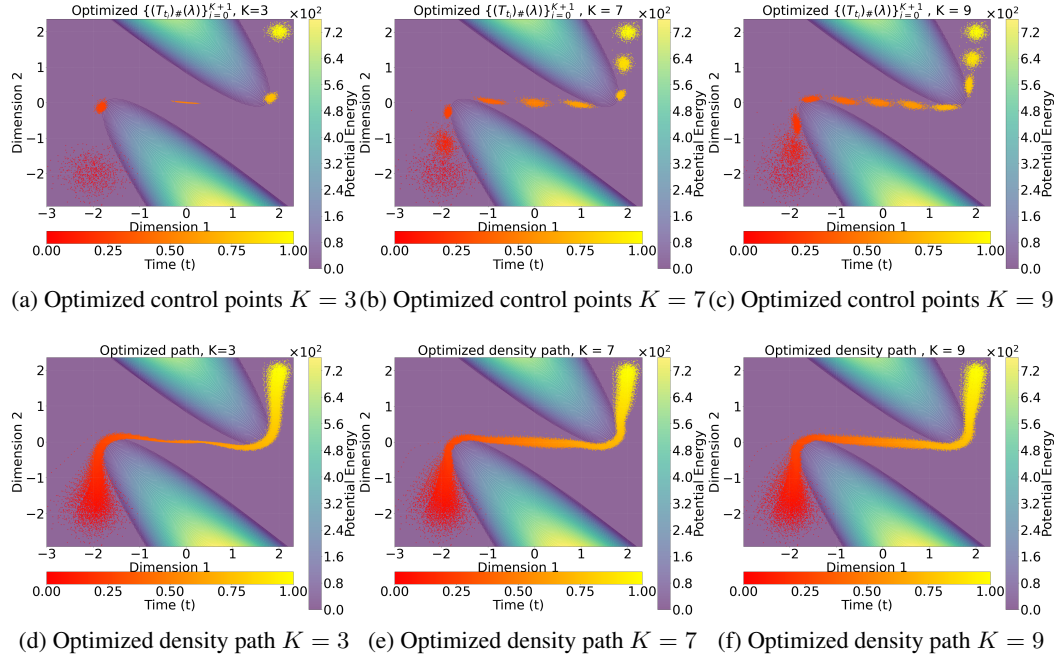Figure 8: Comparison of solutions with increasing number of control points  $K$ .

**Remark:** In Table 1 we reported the  $W_2$  distance of the boundaries for GSBM. The samples at the terminal time  $t = 1$  are generated by the forward solver, while the samples at the initial time  $t = 0$  are produced by the backward solver.

**S-curve** The definition of the problem and source code were taken from [16]. We refer to it for the definition of the obstacle. APAC-Net was more sensitive to the coefficient  $\kappa_0$  and  $\kappa_2$ ; there we used  $\kappa_0 = 5$  and  $\kappa_2 = 1$ . The action reported in Table 1 for APAC-Net was obtained by evaluating its

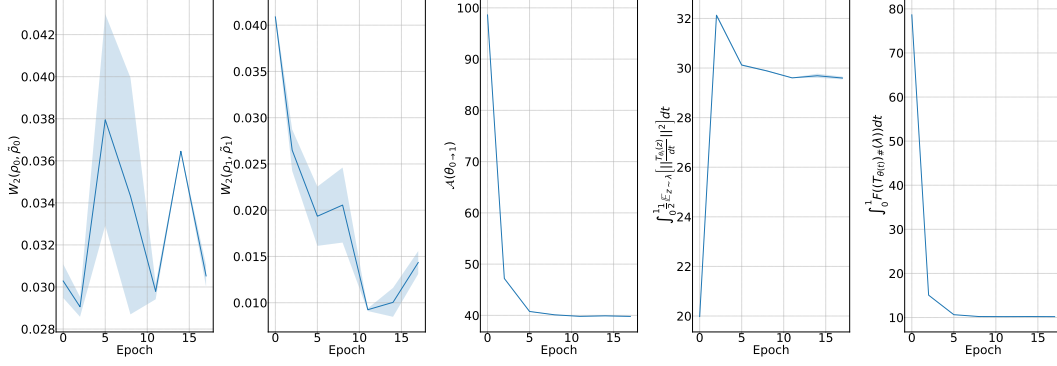

Figure 9: Quantities of interest with uncertainty estimates along the training process, **S-curve**.

911 solution using our code with the values of  $\kappa_0, \kappa_2$  reported in 2. In Figure 9 we show the  $W_2$  distance  
 912 with the boundaries, action, kinetic energy, and potential function along the training process. In these  
 913 plots, an epoch is the completion of coupling + path optimization iterations. In these plots, we can  
 914 clearly see that the feasibility condition is met from epoch 0 thanks to our pre-training strategy.

915 Both schedulers in this experiment are StepLR. The learning rate for the coupling optimizer is  $10^{-4}$   
 916 with a step size of 10, and  $\gamma = 0.9$ . The learning rate for the path optimizer is  $5 \times 10^{-4}$ , step size of  
 917 10 and  $\gamma = 0.1$ .

918 **V-Neck** The definition and source code were taken from [19]. When GSBM's training time is  
 919 constrained to match PDPO's training time, its action value is the same as before, but the boundary  
 920 approximation is noticeably worse,  $W_2(\rho_0, \tilde{\rho}_0) = 0.12 \pm 0.002$ ,  $W_2(\rho_1, \tilde{\rho}_1) = 0.107 \pm 0.002$  1h  
 921 15m 24s.

922 In Figure 11 we report the quantities of interest along the training epochs. See 10 to see the  
 923 pushforward of the three control points, and the comparison of the PDPO and GSBM solutions.

924 Both schedulers in this experiment are StepLR. The learning rate for the coupling optimizer is  $10^{-4}$   
 925 with a step size of 5, and  $\gamma = 0.1$ . The learning rate for the path optimizer is  $5 \times 10^{-3}$ , step size of 5  
 926 and  $\gamma = 0.25$

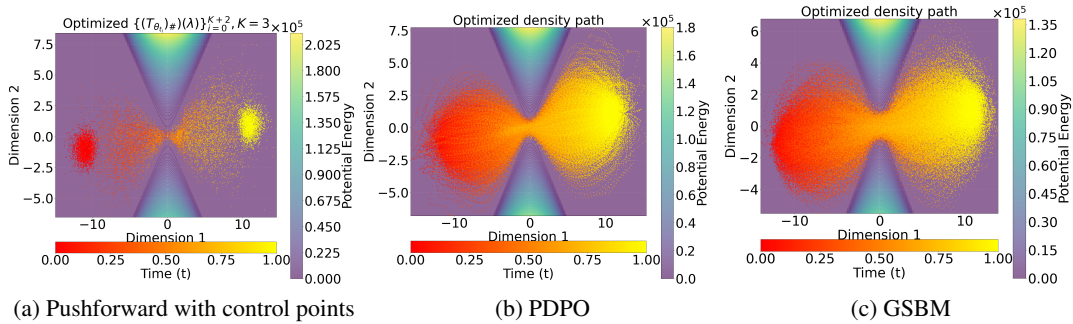

Figure 10: V-neck-E-FI a) Pushforward with control points. b) Pushforward with interpolated curve.  
 c) Solution by GSBM.

927 **GMM** The definition and source code were taken from [19]. See Figure 12 for the comparison of the  
 928 solutions. In this example, we use  $\lambda = \rho_0$ . To guarantee this is satisfied, we define  $\theta_0 := \mathbf{0}$ , the zero  
 929 vector. In Figure 13 we report the quantities of interest along the training epochs. See 12 to see the  
 930 pushforward of the five control points, and the comparison of the PDPO and GSBM solutions.

931 The schedulers in this experiment are cosine for the coupling optimization and StepLR for the path  
 932 optimization. The learning rate for the coupling optimizer is  $5 \times 10^{-6}$ , the setup for the cosine  
 933 scheduler is  $T_0 = 5$ ,  $T_{\text{mult}} = 2$ ,  $\eta_{\text{min}} = 1 \times 10^{-6}$ . The learning rate for the path optimization is  
 934 0.001, step size of 3, and  $\gamma = 0.9$



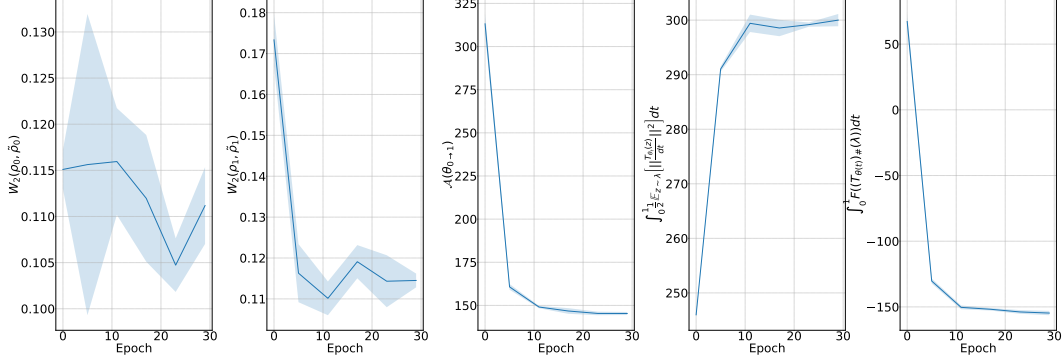

Figure 11: Quantities of interest with uncertainty estimates along the training process, **vneck**

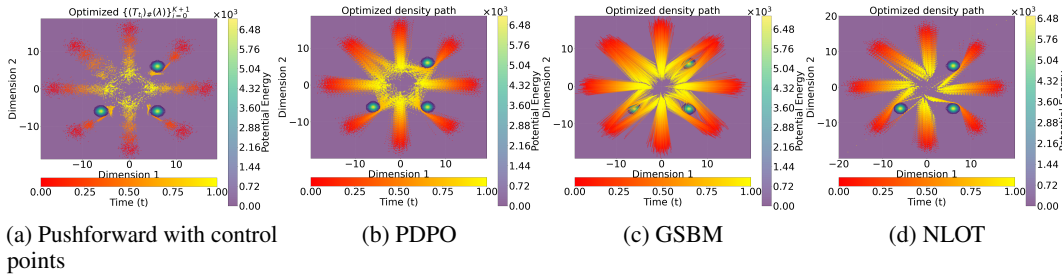

Figure 12: Comparison for GMM example

## 935 E.5 Opinion Depolarization

936 In this problem, opinions  $X(t) \in \mathbb{R}^{1000}$  evolve according to a polarizing dynamic:

$$\frac{dx(t)}{dt} = f_{\text{polarize}}(x(t); p_t),$$

937 with

$$f_{\text{polarize}}(x; p_t, \xi_t) := \mathbb{E}_{y \sim p_t}[a(x, y, \xi_t)\bar{y}], \quad a(x, y, \xi_t) := \begin{cases} 1 & \text{if } \text{sign}(\langle x, \xi_t \rangle) = \text{sign}(\langle y, \xi_t \rangle) \\ -1 & \text{otherwise} \end{cases}.$$

938 When this dynamic evolves without intervention, opinions naturally segregate into groups with  
939 diametrically opposed views. However, the desired outcome is a unimodal distribution.

940 To solve this problem, we follow [19] and incorporate the polarizing dynamics as a base drift or prior.  
941 See [10] for a reference in OT problems with prior velocity fields. Specifically, the action to optimize

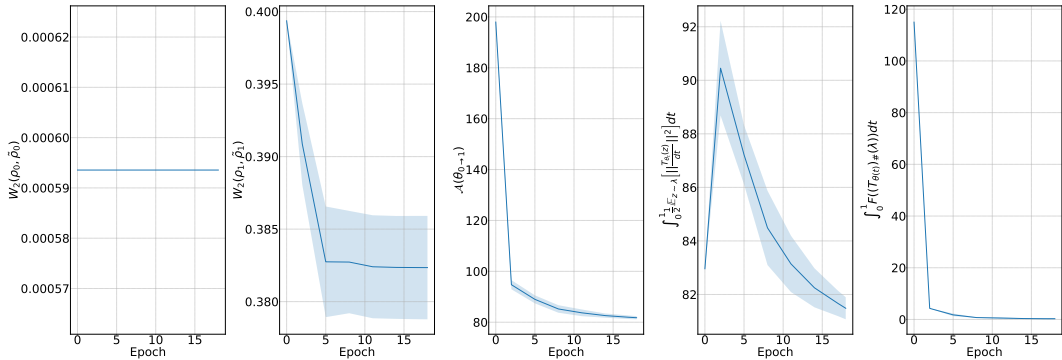

Figure 13: Quantities of interest with uncertainty estimates along the training process, **GMM**

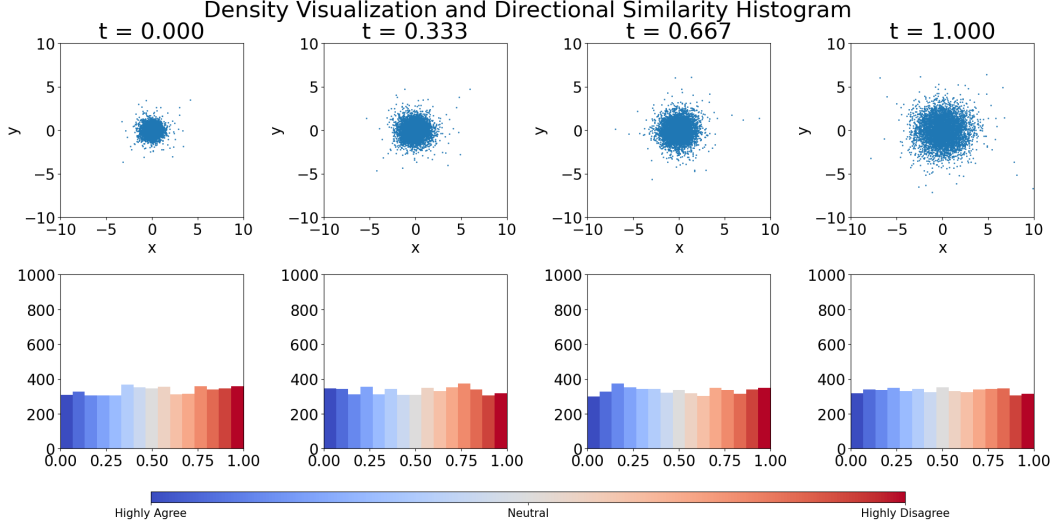

(a) PDPO

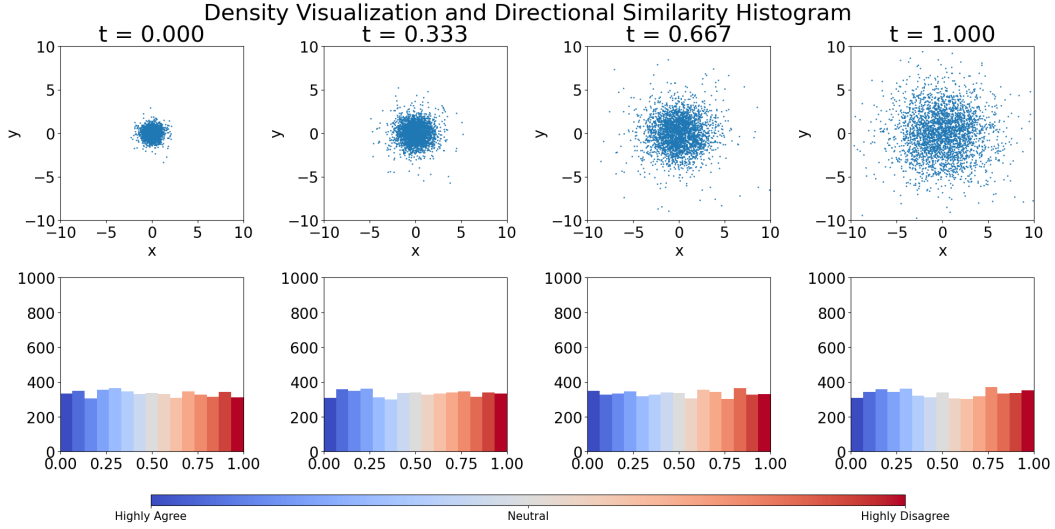

(b) GSBM

Figure 14: Comparison of optimized opinion polarization dynamics.

942 in the parameter space is defined by

$$\mathcal{A}_{\text{polarize}}(\theta_{0 \rightarrow 1}) := \mathbb{E}_{z \sim \lambda} \left[ \frac{1}{2} \|f_{\text{polarize}}(T_{\theta(t)}(z); (T_{\theta(t)})_{\#}(\lambda)) - \frac{d}{dt} T_{\theta(t)}(z)\|^2 \right] + \int_0^1 F((T_{\theta(t)})_{\#}(\lambda)) dt.$$

943 The potential energy term is a congestion cost that encourages particles to maintain a distance from  
 944 each other. We follow the experimental setup in [19] and [18]. Because of the dimension, we can  
 945 only simulate deterministic dynamics, as specified in [29]. In Figure 14 we compare the optimized  
 946 density trajectory and directional similarity histogram. These plots show that both methods obtain a  
 947 nonpolarized trajectory.

## 948 F.6 50D Schrödinger Bridge

949 The SB between Gaussians has a closed-form solution [7]. In Table 3, we evaluate PDPO’s accuracy  
 950 by computing two different path discrepancies:  $\int_0^1 W_2^2(\rho_{\theta(t)}, \rho(t)) dt$  and  $\int_0^1 W_2^2(\rho_{\theta(t)}, \tilde{\rho}(t)) dt$ .  
 951 Here,  $\rho(t)$  represents the theoretical SB solution between the original Gaussian boundaries,  $\tilde{\rho}(t)$  is

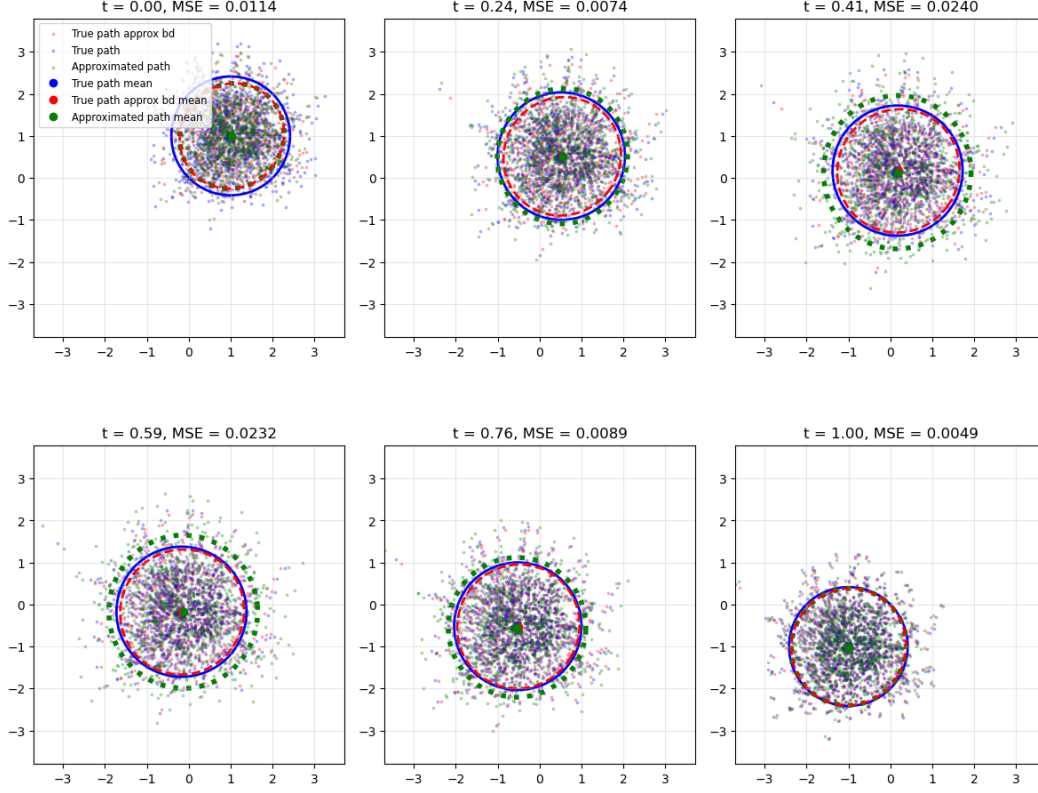

Figure 15: Particle comparison in two random directions.

the SB solution between the approximated boundaries  $(T_{\theta_0})_{\#}\lambda$  and  $(T_{\theta_1})_{\#}\lambda$ , and  $\rho_{\theta(t)}$  is the density path recovered by PDPO. The first integral measures how closely PDPO approximates the true SB solution, while the second evaluates how well PDPO solves the boundary-approximated problem.

While the tabular results quantify the global accuracy of our method, Figure 15 provides a more intuitive visualization through a 2D projection of sample trajectories. In the figure, blue points represent samples from our PDPO solution  $\rho_{\theta(t)}$ , green points show the theoretical solution  $\rho(t)$ , and red points display the boundary-matched solution  $\tilde{\rho}(t)$ . This visualization demonstrates that PDPO accurately approximates individual particle trajectories throughout the transport process, confirming the effectiveness of our approach even in high-dimensional settings.

Table 3: SB between Gaussians

| d   | $\sigma$ | $\int_0^1 W_2^2(\rho_{\theta(t)}, \rho(t)) dt$ | $\int_0^1 W_2^2(\rho_{\theta(t)}, \tilde{\rho}(t)) dt$ |
|-----|----------|------------------------------------------------|--------------------------------------------------------|
| 50D | 1        | $0.778 \pm 0.0018$                             | $0.789 \pm 0.001$                                      |
